# Supplementary material
Source: ML conference proceedings conference paper supplement (https://openreview.net/forum?id=sdK5Ufoo2d)
Supplement: supplementary_material [file curious_causality_seeking_agents (4).pdf › curious_causality_seeking_agents (4).pdf]

---

# Curious Causality-Seeking Agents in Open-ended Worlds

---

Zhiyu Zhao<sup>1</sup>, Haoxuan Li<sup>2</sup>, Haifeng Zhang<sup>3,4</sup>, Jun Wang<sup>5</sup>, Francesco Faccio<sup>6,7</sup>,  
Jürgen Schmidhuber<sup>6,7</sup>, Mengyue Yang<sup>1\*</sup>

<sup>1</sup>University of Bristol    <sup>2</sup>Peking University

<sup>3</sup>Institute of Automation, Chinese Academy of Sciences

<sup>4</sup>School of Artificial Intelligence, Chinese Academy of Sciences

<sup>5</sup>University College London

<sup>6</sup>King Abdullah University of Science and Technology

<sup>7</sup>The Swiss AI Lab, IDSIA-USI/SUPSI

## Abstract

When building a world model, a common assumption is that the environment has a single, unchanging underlying causal rule, like applying Newton’s laws to every situation. However, in truly open-ended environments, the apparent causal mechanism may drift over time because the agent continually encounters novel contexts and operates within a limited observational window. This brings about a problem that, when building a world model, even subtle shifts in policy or environment states can alter the very observed causal mechanisms. In this work, we introduce the **Meta-Causal Graph** as world models for open-ended environments, a minimal unified representation that efficiently encodes the transformation rules governing how causal structures shift across different latent world states. A single Meta-Causal Graph is composed of multiple causal subgraphs, each triggered by meta state, which is in the latent state space. Building on this representation, we introduce a **Causality-Seeking Agent** whose objectives are to (1) identify the meta states that trigger each subgraph, (2) discover the corresponding causal relationships by agent curiosity-driven intervention policy, and (3) iteratively refine the Meta-Causal Graph through ongoing curiosity-driven exploration and agent experiences. Experiments on both synthetic tasks and a challenging robot arm manipulation task demonstrate that our method robustly captures shifts in causal dynamics and generalizes effectively to previously unseen contexts.

## 1 Introduction

World models [21, 62, 70] have emerged as a critical component in reinforcement learning, enabling agents to simulate and plan in complex environments. These models aim to capture the underlying dynamics of the environment, allowing agents to predict future states and evaluate potential actions [23, 21, 62, 55]. However, simply learning which variables correlate can mislead an agent when the world’s dynamics change. Recently, causality has been adopted to improve world models for interactive and complex environments, since causal rules—describing how one factor brings about another—capture the underlying data-generation process and yield more robust and generalizable decision-making [36, 59]. While many existing approaches incorporate notions of causality, they typically fail to capture the open-world causal relationships.

To identify the underlying world rules, traditional causal models rely predominantly on observational data [46], implicitly assuming a fixed causal structure. In open-ended environments, although the

---

\*Corresponding author: mengyue.yang@bristol.ac.uk

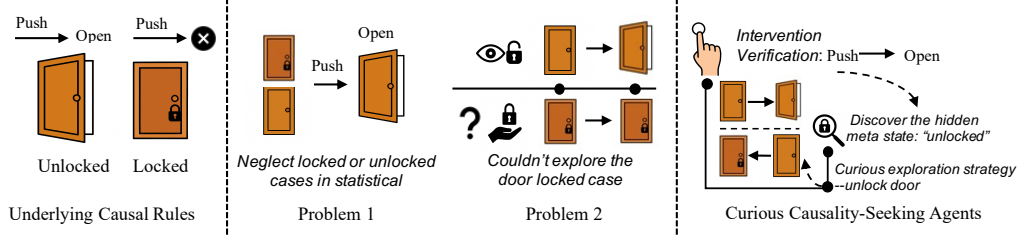

Figure 1: Illustration of the Meta-Causal Graph concept and the Curious Causality-Seeking Agent framework. **Ground Truth:** The causal relationship between pushing and opening depends on the latent state (locked vs. unlocked). **Limitations of Existing Approaches:** Problem 1: Single uniform causal graphs fail to capture context-dependent variations in causal relationships; Problem 2: Domain modeling requires a priori knowledge of state labels, limiting generalization to novel contexts. **Our Approach:** Curious Causality-Seeking Agents actively intervene to verify causal relationships and discover the critical meta states that determine when causal structures change, enabling the agent to build a comprehensive Meta-Causal Graph without requiring predefined domain labels.

ground-truth causal laws remain unchanged, the observational data is collected through local, context-limited exploration. Under conditions of partial observability, this invariance becomes obscured within a limited observational window, giving rise to the illusion of shifting causal relationships—a rule valid in one context may break down in another. For instance, the "push  $\rightarrow$  open" relation holds for an unlocked door, but this relation vanishes when the door is locked. In this case, the same action produces no effect, leaving the true causal mechanism ambiguous. Traditional causal modeling in such scenarios faces two main challenges: (1) methods that learn a single uniform (time series-based) causal graph neglect these context-dependent changes [47], and (2) lack of an active curiosity-driven exploration strategy, which makes it struggle to adapt to discover the global causal rules in rich, unseen variations of potential open-ended worlds [29, 31].

To deal with these two challenges, we propose the **Meta-Causal Graph** to describe the world, which is a unified structure that captures how causal relationships evolve across different states. Rather than relying on a uniform graph, the Meta-Causal Graph is a minimal representation that contains multiple causal subgraphs, each corresponding to a particular meta state. Transitions between these meta states "trigger" the activation of the appropriate subgraph, allowing us to model shifts in causal influence, such as when a locked door severs the "push  $\rightarrow$  open" link. We introduce a framework termed **Curious Causality-Seeking Agent**, which actively explores interventions to uncover the Meta-Causal Graph. The main contributions of this work are given below:

Theoretically, we derive sufficient conditions ensuring that strategically chosen families of interventions uniquely identify meta-causal graphs, overcoming observational limitations.

Methodologically, we design a framework which leverages a curiosity-driven exploration strategy where agents selectively intervene in the environment to learn a causal world model. First, we employ interventional verification to directly test whether specific variables causally influence others under different state conditions. Unlike methods relying solely on observational data, our approach actively intervenes on variables to establish causal links. Second, we introduce a targeted exploration strategy designed to discover meta states, critical configurations where causal structure changes.

Empirically, our approach demonstrates substantial improvements over purely observational baselines in simulated benchmarks, showcasing its capability to accurately recover complex causal structures. By explicitly modeling and reasoning about these causal relationships through active interventions, our proposed method significantly enhances the robustness and adaptability of world models.

## 2 Preliminaries

In this work, we employ causal modeling to construct world models. We begin by introducing fundamental definitions and terminology related to causal graphs and interventions.

**Causal Graph.** A causal subgraph is formalized as a directed acyclic graph (DAG)  $\mathcal{G} = ([p], E)$ , where the vertex set  $[p] = \{1, 2, \dots, p\}$  indexes a collection of random variables  $X = \{X_i\}_{i=1}^p$  with

joint density  $f(X)$ . The edge set  $E \subseteq [p] \times [p]$  encodes direct causal relationships between variables. For each node  $i \in [p]$ , we write  $\text{Pa}_{\mathcal{G}}(i)$  for its set of parents. An edge  $i \rightarrow j \in E$  indicates that  $X_i$  exerts a direct causal influence on  $X_j$ .

**Intervention.** Directly learning the causal structure from observational data is often insufficient, as it can lead to multiple possible causal graphs that share the same v-structures. To resolve this ambiguity, we can use interventions to break the observational ambiguity. Intervention is a powerful tool in causality. An intervention refers to the manipulation of a variable within a causal model, often represented by the do-operator. For example, consider intervening on state  $X_k$ , where the system originally takes the value  $X_k = x_k$ . An intervention is performed by setting the state variable to a new value, as in  $\text{do}(X_i = x'_i)$ , such as setting “door open” to true in the environment.

During world-model learning, we perform a sequence of environment interventions to reveal causal structure. To better formalize the intervention influence, in this paper, we introduce the notion of an **intervention target**. At intervention step  $k$ , we select a single variable  $X_i$  as the target, which we denote by the intervention target  $I_k = \{i\}$ , where  $i \in [p]$ . Applying an intervention  $\text{do}(X_{I_k} = x')$  removes all incoming causal links into  $X_i$ . Concretely, if  $\mathcal{G}$  is the original DAG, the *intervention graph*  $\mathcal{G}^{(k)}$  is obtained by removing every edge of the form  $j \rightarrow i$ ,  $\forall j \in \text{Pa}_{\mathcal{G}}(i)$ , from  $\mathcal{G}$ . This modified graph accurately reflects the altered generative process under the do-operation on  $X_i$ .

**Definition 1** (Intervention graph [27]). *Let  $D = ([p], E)$  be a DAG with vertex set  $[p]$  and edge set  $E$ , and  $I \subset [p]$  an intervention target. The intervention graph of  $D$  is the DAG  $D^{(I)} = ([p], E^{(I)})$ , where  $E^{(I)} := \{a \rightarrow b \mid a \rightarrow b \in E, b \notin I\}$ .*

Given  $\mathcal{I}$ , the **Interventional Markov Equivalence** is defined as follows:

**Definition 2** (Interventional Markov Equivalence [27]). *Two DAGs  $D_1$  and  $D_2$  are interventional Markov equivalent given a set of intervention target  $\mathcal{I}$  if  $D_1$  and  $D_2$  have the same skeleton and the same v-structures, and  $D_1^{(I)}$  and  $D_2^{(I)}$  have the same skeleton and the same v-structures for all  $I \in \mathcal{I}$ .*

Then the **Interventional Markov Equivalence Class (I-MEC)** is the set of DAGs that are interventional Markov equivalent to each other given a set of intervention targets  $\mathcal{I}$ . Given a set of intervention targets  $\mathcal{I}$ , we can determine the I-MEC of the system. However, the DAGs in the I-MEC are not unique. We denote the set of DAGs in the I-MEC as  $\mathcal{D}_{\mathcal{I}}$ . Although DAGs in  $\mathcal{D}_{\mathcal{I}}$  share the same skeleton and v-structures, they may contain edges with different directions.

### 3 Meta-Causal Graph: Definition and Identifiability

In this section, we present our Meta-Causal Graph for a world formulation. We begin by defining the Meta-Causal Graph, which is a compact causal graph comprising multiple context-specific causal subgraphs, varying from latent meta states in Section 3.1. Then, we show the identifiability of meta states in Section 3.2 and their indicated causal subgraphs in Section 3.3 by interventions.

#### 3.1 Meta-Causal Graph

We consider an environment whose states are represented by a set of variables  $X = \{X_i\}_{i \in [p]} \in \mathcal{X}$ , such that the “door open” is a state in the environment.  $X$  in the environment can be intervened on by manipulating its values directly or influenced by taking actions indirectly. Then, the Meta-Causal Graph is defined on the environment state as follows:

**Definition 3** (Meta-Causal Graph). *The Meta-Causal Graph  $\mathcal{MG}$  consists of a collection of causal subgraphs  $\mathcal{MG} = \{\mathcal{G}_u\}_{u \in U}$ , where each  $\mathcal{G}_u$  corresponds to a distinct meta state  $u \in U$ . The causality skeleton matrix  $M_u$  is a binary matrix where  $M_u[i, j] = 1$  indicates that variable  $i$  is a parent of variable  $j$  (i.e.,  $i \in \text{Pa}(j)$ ) in the causal graph  $\mathcal{G}_u$ . A state-to-meta state mapping  $C : \mathcal{X} \rightarrow U$  assigns each system observation  $\mathbf{x} \in \mathcal{X}$  to its active meta state  $u = C(\mathbf{x})$ . We call  $\mathcal{MG} = (\{\mathcal{G}_u\}, C)$  a Meta-Causal Graph if the following conditions are satisfied:*

1. *There exists a ground truth mapping  $C : \mathcal{X} \rightarrow U$  determining the real meta states.*
2. *Causality skeleton matrices of causal subgraphs are sufficiently different. For all  $u \neq u'$ ,  $M_u \neq M_{u'}$ , i.e., there exists an index  $(i, j)$  such that  $M_u[i, j] \neq M_{u'}[i, j]$ .*

The underlying Meta-Causal Graph in the environment is assumed to be invariant; however, its complete identification requires two steps: (1) identification of latent meta states, and (2) identification of the causal subgraph corresponding to each meta state.

### 3.2 Identifiability of Meta States

In this subsection, we will discuss the identifiability of the meta states from the environment. We first introduce the concept of *swap-label equivalence* between two mappings.

**Definition 4** (Swap-Label Equivalence). *Two mappings  $C_1 : \mathcal{X} \rightarrow U_1$  and  $C_2 : \mathcal{X} \rightarrow U_2$  are swap-label equivalent if there exists a permutation  $g : U_1 \rightarrow U_2$  such that  $C_2(x) = g(C_1(x))$ ,  $\forall x \in \mathcal{X}$ .*

The definition indicates that if we can identify the meta states up to an permutation transformation, we say that the meta states are identifiable up to label swapping. We then show that the meta states are identifiable up to swap-label equivalence under the following assumption.

**Assumption 1** (Mixed Data Structure Learning). *Let  $\mathcal{MG} = \{\mathcal{G}_i\}_K$  be a Meta-Causal Graph with  $K$  causal subgraphs corresponding to distinct meta states  $u \in U$ . Consider a dataset  $\mathcal{D}$  where each sample is generated from one of these causal subgraphs. Let  $S_{\mathcal{D}} \subseteq \{1, 2, \dots, K\}$  denote the indices of causal subgraphs that actually contributed samples to  $\mathcal{D}$ . When learning a single causal graph  $\hat{\mathcal{G}}$  from the mixed dataset  $\mathcal{D}$  (treating all samples as if they were generated from a single causal subgraph), the estimated parent set for each variable  $X_j$  in  $\hat{\mathcal{G}}$  satisfies:*

$$Pa_{\hat{\mathcal{G}}}(X_j) = \bigcup_{i \in S_{\mathcal{D}}} Pa_{\mathcal{G}_i}(X_j) \quad \forall j \in [p]. \quad (1)$$

Under this assumption, the unified graph from pooled data contains the union of all direct parent-child edges present in each causal subgraph. Consequently, the latent meta state are identifiable as follows.

**Theorem 1** (Identifiability of Meta States). *Under Assumption 1, the learned mapping  $\hat{C} : \mathcal{X} \rightarrow \hat{U}$  is swap-label equivalent to the ground truth mapping  $C : \mathcal{X} \rightarrow U$ .*

**Identifiability when number of meta states is unknown:** In practice, we often overparameterize the meta state space by choosing more clusters than actually exist. We prove that this overparameterization does not harm identifiability: even with excess clusters, each true causal subgraph can still be recovered. The following theorem shows that, provided the number of clusters is sufficiently large, the underlying subgraph structures are identifiable up to the observational equivalence.

**Definition 5.** *Two mappings  $C_1 : \mathcal{X} \rightarrow U_1$  and  $C_2 : \mathcal{X} \rightarrow U_2$  are observationally equivalent if there exists a mapping  $\phi : U_1 \rightarrow U_2$  such that  $C_2(x) = \phi(C_1(x))$  for all  $x \in \mathcal{X}$ .*

Intuitively, observational equivalence refers to the condition where two mappings from states to meta states produce the same partitioning of observations, possibly up to relabeling.

**Theorem 2** (Identifiability of Overparameterized Meta States). *Under Assumption 1, if the learned mapping  $\hat{C} : \mathcal{X} \rightarrow \hat{U}$  satisfies  $|\hat{U}| > |U|$ , the learned mapping  $\hat{C}$  is observationally equivalent to the ground truth mapping  $C : \mathcal{X} \rightarrow U$ .*

### 3.3 Identification of Causal Subgraphs

In this subsection, we demonstrate that causal subgraphs for each meta state become uniquely identifiable once edge directionality is determined through interventions.

#### 3.3.1 Causal Subgraph Identification

We employ multiple interventions to determine the causal structure of environment, represented as **intervention target indicator set**  $\mathcal{I} = \{I_k\}_{k=1}^K$ , where  $I_k \subset \{[p]\}$  comprises the indices of intervened variables selected from state variable set  $X = \{X_i\}_{i \in [p]}$  at intervention step  $k$ . These intervention sets are collected from historical data or agent interactions. We establish sufficient conditions ensuring causal graph edge identifiability through appropriate interventional selection.

**Proposition 1** (Identifiability of Causal Subgraph). *The causal subgraph  $D$  can be uniquely identified if there exists an intervention target indicator set  $\mathcal{I}$  such that for all edges  $a \rightarrow b \in D$ , there exists an intervention target  $I \in \mathcal{I}$  such that  $|I \cap \{a, b\}| = 1$ .*

This proposition establishes that causal subgraph identifiability requires edge-specific interventions targeting single connected variables, enabling directional determination.

## 4 Curious Causality-Seeking Agents for Open-Ended World Modeling

We propose a novel framework to learn the Meta-Causal Graph through a Causality-Seeking Agent. Our approach comprises three core components: (1) curiosity-driven interventional exploration in an open-ended world, (2) Meta-Causal Graph discovery from agent experience, and (3) continual world model learning and updating. Together, these components enable the agent to actively discover and refine causal structures in open-ended environments.

### 4.1 Curiosity-Driven Interventional Exploration in Open-Ended Worlds

Accurate identification of the Meta-Causal Graph cannot rely solely on passive experience. First, causal structures inferred from purely observational trajectories often suffer from edge misorientation. Second, an agent’s experience typically spans only a limited subset of world states, leaving parts of the causal graph unobserved. To reveal the full Meta-Causal Graph in an open-ended environment, the agent must complement passive observation with targeted, curiosity-driven interventions that actively probe uncertain causal relations.

**Curiosity Reward.** Our framework treats curiosity as a general intrinsic signal that can be instantiated in multiple forms. Specifically, we experimented with the following formulations:

(1) *Edge-Entropy.*  $I_t^{\text{edge}} = \sum_{i,j \in [p]} H(\hat{M}_{C(X_t)}[i,j])$ , where  $\hat{M}_{C(X_t)}[i,j] \in [0,1]$  denotes the posterior probability of an edge from variable  $i$  to  $j$  in the current meta state  $C(X_t)$ , and  $H(\cdot)$  is the Shannon entropy. This term prioritizes interventions on the most uncertain parts of the causal graph.

(2) *Prediction Uncertainty.*  $\mathcal{I}_t^{\text{unc}} = H[p_\theta(x_{t+1} \mid x_t, a_t)]$ , where  $p_\theta(x_{t+1} \mid x_t, a_t)$  is the world model’s predictive distribution over the next state given current state–action pair  $(x_t, a_t)$ . Higher entropy indicates epistemic uncertainty about future transitions.

(3) *Feature Discrepancy.*  $\mathcal{I}_t^{\text{feat}} = \|E(x_{t+1}) - E_\theta(\hat{x}_{t+1})\|_2^2$ , where  $\phi(\cdot)$  is the learned feature encoder and  $E_\theta(\hat{x}_{t+1})$  is the predicted feature of the next state  $\hat{x}_{t+1}$ . This term measures reconstruction error in the feature space, highlighting dynamics that the model fails to capture.

(4) *Predictive-Distribution Discrepancy.*  $\mathcal{I}_t^{\text{nl}} = -\log p_\theta(x_{t+1} \mid x_t, a_t)$ , which is the surprisal or negative log-likelihood of the observed transition.

Any of these intrinsic terms can be used as the curiosity reward  $R_t$  to select interventions, and in our main results we adopt the edge-entropy variant as the default while other forms yield comparable behaviors (see Table 9).

**Intervention Verification.** After executing curiosity-guided interventions, we validate and refine the learned causal structures by directly estimating causal effects. For each variable  $X_i$ , we perform interventions  $\text{do}(X_i = x'_i)$  and observe the resulting changes in other variables. We estimate the causal effect of  $X_i$  on  $X_j$  as

$$\Delta_{ij} = \log P(X_j^{t+1} \mid X^t, \text{do}(X_i = x'_i)) - \log P(X_j^{t+1} \mid X^t).$$

We integrate these effects into a mask-refinement loss

$$\mathcal{L}_{\text{mask}} = -\lambda_1 \sum_{\{(i,j): |\Delta_{ij}| > \tau\}} \log \hat{M}_{ij} + \lambda_2 \sum_{\{(i,j): |\Delta_{ij}| < \tau\}} \log \hat{M}_{ij},$$

where  $\tau \geq 0$  controls sensitivity.

**Interventional Reachability.** In realistic environments, not all variables are directly intervenable. To formalize which causal relations are identifiable under such constraints, we introduce *interventional reachability*. We define an *intervention operator*  $F \in \{0,1\}^{N \times N}$  where  $F[k,i] = 1$  if and only if state  $k$  can be obtained from state  $i$  by a single allowed intervention, and a *transition operator*  $T \in \{0,1\}^{N \times N}$  for the environment’s natural dynamics after intervention. The composite  $TF$

models one intervention–transition cycle, and nonzero entries of  $(TF)^k z_0$  enumerate states reachable within  $k$  cycles. A state is reachable if and only if some finite  $k$  satisfies  $[(TF)^k z_0][i] > 0$ . These constraints define the feasible set of causal interventions. Details are given in Appendix E.

## 4.2 Meta-Causal Graph Discovery from Agent Experience

Given trajectories collected through curiosity-driven interventions, the agent infers a structured representation of causal dependencies that vary across latent meta states. The goal is to jointly learn (i) the discrete latent variable  $C(X_t)$  indicating the current meta state, and (ii) the corresponding causal skeleton matrix  $M_{C(X_t)}$  that governs the local dynamics.

**Representation Learning.** To model context-dependent causal dependencies from trajectories generated by curiosity-driven interventions, we discretize the latent dynamics of the environment using a vector-quantized variational auto-encoder (VQ-VAE) [31]. The encoder maps concatenated state–action pairs  $(x_t, a_t)$  into a latent vector  $z_e$ , which is quantized to the nearest codebook entry  $z_u$  associated with a meta state  $u$ . Each codebook entry defines a distribution over causal structures, from which the causal skeleton matrix  $M_{C(X_t)}$  is sampled. Further details are provided in Appendix E.

**Effect of Lossy Representation.** The latent representation learned through vector quantization is inherently lossy due to imperfect mapping. Such lossy representations may distort the underlying causal factors and thus influence the identification of both meta states and their associated causal subgraphs. We provide an error bound of lossy representation in the following.

**Proposition 2** (Effect of Representation Accuracy on Misclassification). *Given a set of ground-truth meta states  $U = \{u\}$  and corresponding codebook entry index  $\hat{U} = \{\hat{u}_k\}$ , let  $p_k = \sum_{u \in U} \mu_u p_k^u$  denote the probability that a sample  $x$  is mapped to codebook entry  $z_{\hat{u}_k}$ . Then, under the lossy representation induced by encoder, the probability of misclassification is*

$$P(\text{misclassification}) = 1 - \sum_k \sum_{u \in U} \mu_u p_k^u (1 - p_k + p_k^u \mu_u)^n.$$

When  $n(p_k + p_k^u \mu_u) \ll 1$ , this can be approximated as

$$P(\text{misclassification}) \approx \sum_k \left[ p_k^2 - \sum_u (\mu_u p_k^u)^2 \right].$$

**Adaptive Codebook Fusion.** To prevent redundant meta states resulted from overparamterization and maintain a minimal representation, we adopt an *Adaptive Codebook Fusion* mechanism. During training, codebook entries encoding similar latent embeddings and producing comparable decoded causal skeleton matrices are automatically merged. This fusion step is integrated into the quantization update, requires no extra supervision, and reallocates capacity for novel meta states.

## 4.3 Transition Probability Learning

The previous subsections describe how to identify the parent set of each state variable,  $Pa_{G_u}(X_j)$ , using the learned causal skeleton matrix  $M_\theta$ . In this section, we demonstrate how to leverage the confirmed causal skeleton to quantify inter-variable causal effects, thereby grounding and validating the transition probabilities of the world model for next-state prediction. We train our model by maximizing the log-likelihood of the observed sequences, thereby learning the transition dynamics.

$$\mathcal{L}_{\text{MLE}} = -\log P(X_j^{t+1} | Pa_{G_u}(X_j)).$$

**The complete world model learning objective.** To encourage the discovery of parsimonious causal structures that capture essential relationships while avoiding spurious connections, we incorporate a sparsity regularization term:  $\mathcal{L}_{\text{sparse}} = \|\hat{M}_\theta\|_1$ , where  $\|\hat{M}_\theta\|_1$  denotes the L1 norm of the causal skeleton probability matrix, promoting sparsity in the learned causal graphs. The complete optimization objective integrates multiple components is as follows:

$$\mathcal{L} = \mathcal{L}_{\text{MLE}} + \lambda_{\text{sparse}} \mathcal{L}_{\text{sparse}} + \lambda_{\text{mask}} \mathcal{L}_{\text{mask}} + \lambda_{\text{quantization}} \mathcal{L}_{\text{quantization}}.$$

Training proceeds by alternating among interventional exploration, causal subgraph updating, world model learning, and codebook refinement. Algorithm 1 summarizes the complete learning procedure.

Table 1: Prediction accuracy on OOD states in the Chemical environment. The number of noisy nodes in the downstream tasks is denoted as  $n$ . All values are reported in percentage (%).

| Algorithm                          | Fork                              |                                  |                                  | Chain                            |                                  |                                  |
|------------------------------------|-----------------------------------|----------------------------------|----------------------------------|----------------------------------|----------------------------------|----------------------------------|
|                                    | n=2                               | n=4                              | n=6                              | n=2                              | n=4                              | n=6                              |
| GNN                                | 36.29 $\pm$ 3.45                  | 25.80 $\pm$ 3.48                 | 21.58 $\pm$ 3.44                 | 29.22 $\pm$ 3.39                 | 23.28 $\pm$ 4.98                 | 20.53 $\pm$ 6.96                 |
| MLP                                | 31.11 $\pm$ 1.69                  | 30.44 $\pm$ 2.28                 | 32.39 $\pm$ 1.76                 | 28.66 $\pm$ 3.65                 | 26.52 $\pm$ 4.26                 | 24.15 $\pm$ 4.17                 |
| NCD                                | 41.60 $\pm$ 5.08                  | 37.47 $\pm$ 2.13                 | 42.27 $\pm$ 1.82                 | 40.04 $\pm$ 6.21                 | 37.47 $\pm$ 2.98                 | 41.19 $\pm$ 1.66                 |
| FCDL                               | 57.82 $\pm$ 9.90                  | 49.29 $\pm$ 8.90                 | 47.70 $\pm$ 6.68                 | 50.66 $\pm$ 10.10                | 48.81 $\pm$ 8.91                 | 48.05 $\pm$ 5.86                 |
| Modular                            | 26.53 $\pm$ 3.45                  | 24.73 $\pm$ 5.61                 | 26.73 $\pm$ 8.31                 | 25.24 $\pm$ 4.68                 | 24.94 $\pm$ 4.81                 | 25.09 $\pm$ 5.91                 |
| NPS                                | 40.56 $\pm$ 4.61                  | 26.81 $\pm$ 4.37                 | 23.02 $\pm$ 4.27                 | 38.73 $\pm$ 2.63                 | 27.69 $\pm$ 4.28                 | 24.45 $\pm$ 3.84                 |
| CDL                                | 35.59 $\pm$ 1.85                  | 35.82 $\pm$ 1.40                 | 42.22 $\pm$ 1.39                 | 34.90 $\pm$ 1.59                 | 36.52 $\pm$ 1.72                 | 42.06 $\pm$ 1.29                 |
| GRADER                             | 37.93 $\pm$ 1.06                  | 38.94 $\pm$ 1.63                 | 45.74 $\pm$ 2.25                 | 36.82 $\pm$ 3.12                 | 37.41 $\pm$ 2.84                 | 43.48 $\pm$ 4.14                 |
| Oracle                             | 33.87 $\pm$ 1.34                  | 36.48 $\pm$ 1.80                 | 42.47 $\pm$ 0.75                 | 34.63 $\pm$ 1.78                 | 38.31 $\pm$ 2.48                 | 42.87 $\pm$ 2.08                 |
| Sandy-Mixture                      | 31.93 $\pm$ 0.16                  | 32.47 $\pm$ 0.0161               | 33.72 $\pm$ 2.11                 | 30.08 $\pm$ 3.12                 | 29.31 $\pm$ 5.18                 | 27.43 $\pm$ 2.20                 |
| Transformer                        | 25.13 $\pm$ 0.63                  | 24.37 $\pm$ 2.58                 | 21.90 $\pm$ 2.35                 | 29.62 $\pm$ 0.65                 | 30.37 $\pm$ 2.81                 | 29.78 $\pm$ 1.08                 |
| MCG (wo mask loss)                 | 58.18 $\pm$ 14.51                 | 51.70 $\pm$ 8.58                 | 46.04 $\pm$ 8.56                 | 47.75 $\pm$ 7.52                 | 46.19 $\pm$ 5.87                 | 47.94 $\pm$ 6.60                 |
| MCG (wo intervention verification) | 48.28 $\pm$ 8.15                  | 43.48 $\pm$ 5.05                 | 46.54 $\pm$ 3.72                 | 50.36 $\pm$ 8.05                 | <b>50.55<math>\pm</math>6.83</b> | 48.72 $\pm$ 4.42                 |
| <b>MCG (ours)</b>                  | <b>63.18<math>\pm</math>13.94</b> | <b>50.47<math>\pm</math>9.87</b> | <b>50.04<math>\pm</math>8.56</b> | <b>51.99<math>\pm</math>6.58</b> | 49.78 $\pm$ 4.11                 | <b>49.69<math>\pm</math>5.14</b> |

Table 2: Average episode rewards on downstream tasks for each environment. The number of noisy nodes introduced in the downstream tasks is denoted as  $n$ .

| Algorithm        | Chain                            |                                  |                                  | Fork                             |                                  |                                  | Magnetic                          |
|------------------|----------------------------------|----------------------------------|----------------------------------|----------------------------------|----------------------------------|----------------------------------|-----------------------------------|
|                  | n=2                              | n=4                              | n=6                              | n=2                              | n=4                              | n=6                              |                                   |
| GNN              | 6.89 $\pm$ 0.28                  | 6.38 $\pm$ 0.28                  | 6.56 $\pm$ 0.53                  | 6.61 $\pm$ 0.92                  | 6.15 $\pm$ 0.74                  | 6.95 $\pm$ 0.78                  | 2.23 $\pm$ 0.90                   |
| MLP              | 7.39 $\pm$ 0.65                  | 6.63 $\pm$ 0.58                  | 6.78 $\pm$ 0.93                  | 6.49 $\pm$ 0.48                  | 5.93 $\pm$ 0.71                  | 6.84 $\pm$ 1.17                  | 2.10 $\pm$ 0.22                   |
| NCD              | 9.60 $\pm$ 1.52                  | 8.86 $\pm$ 0.23                  | 10.32 $\pm$ 0.37                 | 10.95 $\pm$ 1.63                 | 9.11 $\pm$ 0.63                  | 9.11 $\pm$ 0.63                  | 2.85 $\pm$ 0.47                   |
| FCDL             | 11.16 $\pm$ 3.5                  | 10.39 $\pm$ 2.84                 | 10.62 $\pm$ 2.52                 | 13.98 $\pm$ 2.01                 | 13.36 $\pm$ 2.14                 | 12.91 $\pm$ 2.40                 | 2.77 $\pm$ 0.45                   |
| Modular          | 6.61 $\pm$ 0.63                  | 7.01 $\pm$ 0.55                  | 7.04 $\pm$ 1.07                  | 6.05 $\pm$ 0.70                  | 5.65 $\pm$ 0.50                  | 6.43 $\pm$ 1.00                  | 0.88 $\pm$ 0.52                   |
| NPS              | 6.92 $\pm$ 1.03                  | 6.88 $\pm$ 0.79                  | 6.80 $\pm$ 0.39                  | 5.82 $\pm$ 0.83                  | 5.75 $\pm$ 0.57                  | 5.54 $\pm$ 0.80                  | 0.91 $\pm$ 0.69                   |
| CDL              | 8.71 $\pm$ 0.55                  | 8.65 $\pm$ 0.38                  | 10.23 $\pm$ 0.50                 | 9.37 $\pm$ 1.33                  | 8.23 $\pm$ 0.40                  | 9.50 $\pm$ 1.18                  | 1.10 $\pm$ 0.67                   |
| Oracle           | 8.47 $\pm$ 0.69                  | 8.85 $\pm$ 0.78                  | 10.29 $\pm$ 0.37                 | 7.83 $\pm$ 0.87                  | 8.04 $\pm$ 0.62                  | 9.66 $\pm$ 0.21                  | 0.95 $\pm$ 0.55                   |
| Sandy-Mixture    | 6.81 $\pm$ 0.17                  | 6.73 $\pm$ 0.20                  | 7.07 $\pm$ 0.26                  | 6.95 $\pm$ 0.21                  | 6.71 $\pm$ 0.20                  | 7.03 $\pm$ 0.40                  | 1.63 $\pm$ 0.02                   |
| Transformer      | 6.45 $\pm$ 0.28                  | 6.73 $\pm$ 0.18                  | 7.31 $\pm$ 0.33                  | 6.54 $\pm$ 0.18                  | 6.68 $\pm$ 0.27                  | 7.00 $\pm$ 0.39                  | 2.13 $\pm$ 0.01                   |
| <b>MCG(ours)</b> | <b>13.82<math>\pm</math>3.84</b> | <b>12.49<math>\pm</math>2.39</b> | <b>12.45<math>\pm</math>1.37</b> | <b>14.65<math>\pm</math>2.75</b> | <b>14.06<math>\pm</math>2.64</b> | <b>13.28<math>\pm</math>2.04</b> | <b>3.19 <math>\pm</math> 0.14</b> |

## 5 Related Work

**World Models.** World models [21, 62, 70] enable agents to summarize past interactions, predict future states in the environment, and evaluate candidate actions [23, 21, 55, 26, 25]. However, methods that rely solely on statistical correlations often break down when environmental conditions shift, undermining their ability to generalize robustly [59, 77, 18, 19].

**Causal Discovery for Open-Ended World.** Causal discovery provides a rigorous framework for modeling the generative processes that govern complex systems, revealing how one variable brings about changes in another. By explicitly representing cause–effect relationships, causal methods yield more compact and invariant descriptions of reality than do purely statistical correlations [36, 44, 81, 5, 8, 9, 15, 45]. Causal representation learning provides a useful tool to learn causal structure, which aims to recover causally meaningful latent factors and structures, enabling invariance and transfer in downstream tasks [64, 48, 39, 80, 79, 78]. However, most of the work of causal representation learning focusses on learning a static causal structures passively from observational data.

However, identifying causal structure from observational data alone is a challenge since multiple directed acyclic graphs can entail the same conditional independencies and v-structures [76]. To resolve these ambiguities, researchers have turned to the collection of active causal interventional data by actively perturbing variables to distinguish among candidate graphs [52, 33, 72, 6, 66]. More recent work has even addressed settings with unknown intervention targets [27, 28, 14, 41].

Despite these advances, most causal discovery algorithms presume a single uniform, context-independent causal graph [47, 2, 43, 71, 83, 67, 82, 7] in the world. Some recent methods have sought to learn causal structures in changing world [57, 10, 75, 58, 49, 32, 31, 34], but they typically

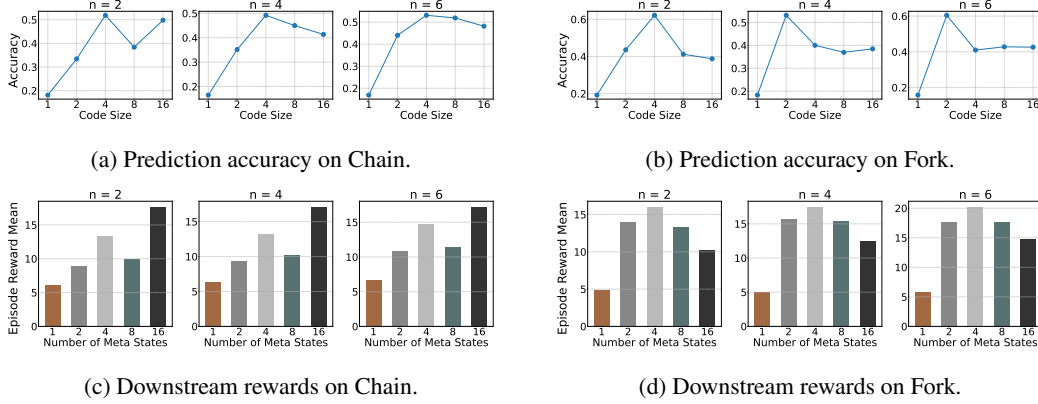

Figure 2: Performance with different numbers of meta states. (a-b) show prediction accuracy on Chain and Fork environments respectively, while (c-d) show corresponding downstream rewards.

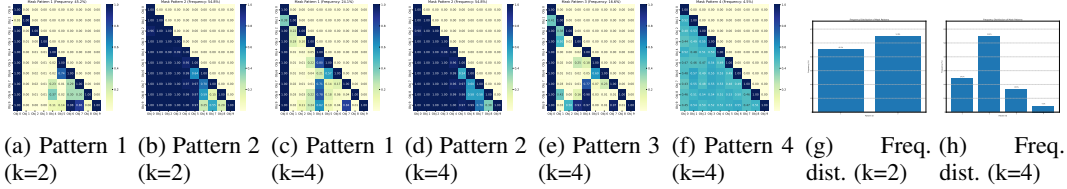

Figure 3: Comparison of causal patterns discovered with different numbers of meta states. When the number of meta states is set to 2, the model learns two distinct causal patterns (a,d) that correspond to the meta states. With 4 meta states, the model learns four patterns (b,c,e,f), where some patterns share similarities (Patterns 1 and 3), while others occur with lower frequency (Pattern 4) as shown in the frequency distributions (g,h).

require strong prior knowledge [57, 29] or complete access to a known dynamic model [10], and they lack active, curiosity-driven exploration strategies for open-ended environments [56].

We introduce an intervention-driven framework that empowers an agent to actively probe its surroundings in order to uncover context-dependent causal graphs. By combining targeted interventions with a curiosity-driven exploration policy, our approach adaptively reveals the global causal rules governing rich, previously unseen environments. Extended related work could be found in Appendix C.

## 6 Experiments

We evaluate our method by examining the following research questions: (1) Does our method learn a more accurate causal world model? (Table 1) (2) Does it enhance performance on downstream tasks? (Table 2) (3) How does overparameterization affect our method’s performance? (Figure 2) (4) Do the curiosity-driven reward and intervention verification improve the learned causal world model quality? (Table 1, Table 2) (5) Does our method enable more accurate causal subgraph learning? (Figure 5)

### 6.1 Experiment Setup

We compare our method against several baselines: **MLP**, a dense model that predicts transition dynamics  $p(x_{t+1}|x_t, a_t)$ ; **Modular**, a modular network with separate modules for each state variable; **GNN** [40], a graph neural network for predicting transition dynamics; **NPS** [2], which learns sparse and modular dynamics; **CDL** [77], which learns a static causal model from data; **GRADER** [13], which learns a static causal model using conditional independence tests; **Sandy-Mixture** [57], which uses Jacobian matrices of MLP layers to learn the local causal graph; **Transformer** [73], which infers causal graphs by attention; **NCD** [31], a neural causal discovery algorithm for learning causal graphs for each sample; and **FCDL** [31] learns causal graph to facilitate the robustness for reinforcement learning. Please check Appendix B for details of the experimental setup.



---

**Algorithm 1** Curious Causality-Seeking Meta Causal World Modeling

---

**Require:** Observational states  $X$ , meta state embedding space  $U$ , initial codebook embeddings  $\{e_u\}$ , encoder  $E$ , decoder  $D$ , hyperparameters  $\lambda_{\text{sparse}}, \lambda_{\text{mask}}, \lambda_{\text{quantization}}$

- 1: Initialize encoder parameters  $\phi$ , decoder parameters  $\theta$ , and embeddings  $\{z_u\}_{u \in U}$
- 2: **while** not converged **do**
- 3:   Compute embedding assignment:  $u \leftarrow \arg \min_{u \in U} \|E_\phi(X) - z_u\|_2^2$
- 4:   Compute causal skeleton probabilities matrix:  $\hat{M}_u \leftarrow D(e_u)$
- 5:   Sample causal skeleton matrix  $M_u[i, j] \sim \text{GumbelSoftmax}(\hat{M}_u[i, j])$
- 6:   Select intervention  $\text{do}(X_i = x'_i)$  maximizing reward  $R_t$  in Section 4.1
- 7:   Perform intervention and record resulting state transitions
- 8:   Estimate causal effects  $\Delta_{ij}$  from interventions and update causal mask parameters via  $\mathcal{L}_{\text{mask}}$
- 9:   Predict next state  $X_j^{t+1}$  from parent set  $\text{Pa}_{\mathcal{G}_u}(X_j)$  and update world model via  $\mathcal{L}_{\text{MLE}}$
- 10:   Encourage sparsity in causal graph via  $\mathcal{L}_{\text{sparse}}$
- 11:   Update embedding codebook  $\{e_u\}$  via  $\mathcal{L}_{\text{quantization}}$
- 12: **end while**
- 13: **return** Learned causal subgraphs  $\mathcal{G}_u$ , world model parameters, and embeddings  $\{e_u\}$

---

## 6.2 Environments

**Chemical** [39] We use the Chemical environment to evaluate the performance of the proposed method on learning the causal graphs in a system with multiple causal structures. There are several causal graphs (*full*, *fork*, *chain*) in the Chemical environment and the causal graph depends on the state of the objects. We use two settings of the Chemical environment: (1) *full-fork* (*Fork*) and (2) *full-chain* (*Chain*). **Magnetic** [31] The *Magnetic* environment is a robot arm manipulation task (Figure 4). This environment is built based on the Robosuite suite. Please refer to Appendix B for more details.

## 6.3 Experiment Results

**Prediction Accuracy.** We evaluate the prediction accuracy of our proposed method in comparison to several baseline approaches. To systematically assess robustness, we introduce varying levels of noise to the state information. For the full-fork and full-chain tasks, we corrupt the values of 2, 4, and 6 nodes, respectively, to measure performance degradation under increasing noise. In the magnetic environment, we assess prediction accuracy when box position coordinates and ball/box color properties are corrupted, thereby testing the model’s performance under partial observability. All experiments are conducted eight times, with results averaged. As shown in Table 1, our method consistently achieves the highest prediction accuracy across nearly all baselines, demonstrating its effectiveness in learning a more accurate causal world model.

**Downstream Task** We evaluate our method against baselines on the Chemical downstream task, using the trained model to predict future states with the learned model for decision making. As shown in Table 2, our approach achieves the highest reward, demonstrating its effectiveness in learning a more accurate causal world model.

**Overparameterization** We evaluate our method using 2, 4, 8, and 16 meta states, with results presented in Figure 3. Performance declines markedly when using fewer meta states than actually exist, as the model fails to capture distinct causal structures. Conversely, overparameterized models consistently outperform underparameterized ones, empirically validating Theorem 2. The learned causal graphs with codebook sizes of 2 and 4 reveal that with 2 meta states, the model learns two distinct causal graphs (Pattern 1 and Pattern 2) corresponding to the two meta states, consistent

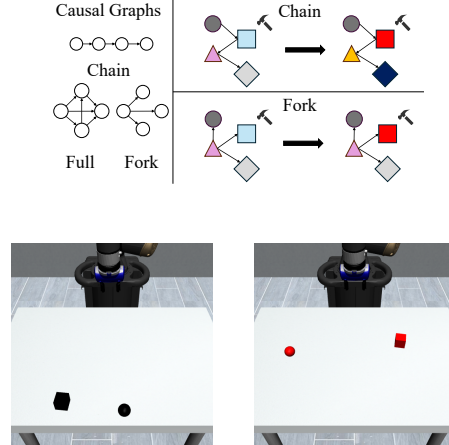

Figure 4: Visualization of environments: (top) **Chemical**; (bottom) **Magnetic**.

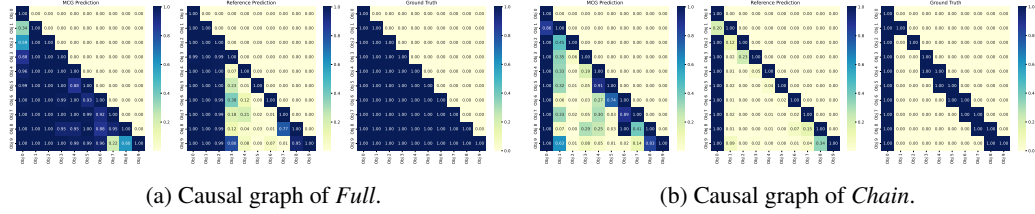

Figure 5: Comparison of learned causal graphs in the Chemical task: left—MCG (ours); middle—reference (FCDL); right—ground truth.

with Theorem 1. With 4 meta states, some codes correspond to similar underlying causal graphs (as shown by the similarity between Pattern 1 and Pattern 3), while codes representing significantly different causal graphs (such as Pattern 4) occur less frequently, minimally affecting overall model performance. This demonstrates the model’s capacity to consolidate redundant representations when overparameterized, aligning with our theoretical findings.

**Ablation Study** We conduct ablation studies to evaluate the effectiveness of the proposed method. We remove the following components from the proposed method: (1) the causal loss  $\mathcal{L}_{\text{mask}}$  and (2) the reward function. The first ablation study aims to test the effectiveness of the intervention verification, while the second ablation study aims to test the effectiveness of the active intervention exploration. The results are shown in Table 2. Overall, the proposed method outperforms the ablation methods. The performance drop of removing the causal loss  $\mathcal{L}_{\text{mask}}$  indicates that the incorporation of the causal loss can help the model learn a more accurate causal world model. The performance drop of removing the reward function indicates that the curiosity-based reward function can help the agent learn a more accurate causal world model through active exploration.

**Partial Observation** We modify the Chemical environment to explicitly simulate challenges arising from limited observation windows. This experimental setup evaluates how our method performs as new variables gradually become observable. The results indicate that our approach remains robust under partial observability and shows strong potential for handling more realistic, dynamically evolving environments. The results are shown in Table 8.

**Efficiency** We compare baselines with longer training rounds and more parameters to show efficiency of our method. Results are reported in Table 10 and Table 11.

**Causal Subgraph** We visualize the learned causal subgraphs in Figure 5. It is evident that the proposed method successfully captures the underlying causal structures of the environment.

Additional results are in Appendix B and the source code is included in the supplementary materials.

## 7 Conclusion, Limitation and Future Work

In this work, we introduced a method to model the environment using the Meta-Causal Graph that explicitly captures how causal relationships evolve across different environmental contexts—meta state. Our approach addresses two critical limitations in existing causal world models: the inability of uniform causal graphs to capture context-dependent changes and the lack of active exploration making it hard to learn the open-world environment. We theoretically established the identifiability of meta states and their corresponding causal subgraphs, and developed the Curious Causality-Seeking Agent framework that actively explores environments through interventions guided by a curiosity-driven reward function. Our empirical evaluations demonstrated that our method outperforms existing approaches across both synthetic tasks and a challenging robot arm manipulation task.

**Limitation and Future Work** Despite these advances, real-world exploration remains subject to inherent constraints: certain states are fundamentally unreachable via any sequence of interventions, and the implications of such unobservability for causal inference have yet to be analyzed (see Appendix A.8). Moreover, interventions incur costs, and practical agents must operate within limited budgets. Future research will investigate the impact of unreachable states on the identifiability and accuracy of learned causal structures, and will develop budget-aware exploration strategies to optimally allocate limited intervention resources.

## References

- [1] Pranav Agarwal, Sheldon Andrews, and Samira Ebrahimi Kahou. Learning to play atari in a world of tokens. *arXiv preprint arXiv:2406.01361*, 2024.
- [2] Anirudh Goyal ALIAS PARTH GOYAL, Aniket Didolkar, Nan Rosemary Ke, Charles Blundell, Philippe Beaudoin, Nicolas Heess, Michael C Mozer, and Yoshua Bengio. Neural production systems. *Advances in Neural Information Processing Systems*, 34:25673–25687, 2021.
- [3] Eloi Alonso, Adam Jelley, Vincent Micheli, Anssi Kanervisto, Amos J Storkey, Tim Pearce, and François Fleuret. Diffusion for world modeling: Visual details matter in atari. *Advances in Neural Information Processing Systems*, 37:58757–58791, 2024.
- [4] Amir Bar, Gaoyue Zhou, Danny Tran, Trevor Darrell, and Yann LeCun. Navigation world models. *arXiv preprint arXiv:2412.03572*, 2024.
- [5] Stephan Bongers, Tineke Blom, and Joris M Mooij. Causal modeling of dynamical systems. *arXiv preprint arXiv:1803.08784*, 2018.
- [6] Philippe Brouillard, Sébastien Lachapelle, Alexandre Lacoste, Simon Lacoste-Julien, and Alexandre Drouin. Differentiable causal discovery from interventional data. *Advances in Neural Information Processing Systems*, 33:21865–21877, 2020.
- [7] Hongye Cao, Fan Feng, Meng Fang, Shaokang Dong, Tianpei Yang, Jing Huo, and Yang Gao. Towards empowerment gain through causal structure learning in model-based reinforcement learning. In *The Thirteenth International Conference on Learning Representations*, 2025.
- [8] Weilin Chen, Ruichu Cai, Zeqin Yang, Jie Qiao, Yuguang Yan, Zijian Li, and Zhifeng Hao. Doubly robust causal effect estimation under networked interference via targeted learning. In *International Conference on Machine Learning*, pages 6457–6485. PMLR, 2024.
- [9] Fengxiang Cheng, Haoxuan Li, Fenrong Liu, Robert Van Rooij, Kun Zhang, and Zhouchen Lin. Empowering llms with logical reasoning: A comprehensive survey. In *Proceedings of the Thirty-Fourth International Joint Conference on Artificial Intelligence*, 2025.
- [10] Rohan Chitnis, Tom Silver, Beomjoon Kim, Leslie Kaelbling, and Tomas Lozano-Perez. Camps: Learning context-specific abstractions for efficient planning in factored mdps. In *Conference on robot learning*, pages 64–79. PMLR, 2021.
- [11] Etched Decart, Q McIntyre, S Campbell, Xinlei Chen, and R Wachen. Oasis: A universe in a transformer. URL: <https://oasis-model.github.io>, 2024.
- [12] Antoine Dedieu, Joseph Ortiz, Xinghua Lou, Carter Wendelken, Wolfgang Lehrach, J Swaroop Guntupalli, Miguel Lazaro-Gredilla, and Kevin Patrick Murphy. Improving transformer world models for data-efficient rl. *arXiv preprint arXiv:2502.01591*, 2025.
- [13] Wenhao Ding, Haohong Lin, Bo Li, and Ding Zhao. Generalizing goal-conditioned reinforcement learning with variational causal reasoning. *Advances in Neural Information Processing Systems*, 35:26532–26548, 2022.
- [14] Gonçalo Rui Alves Faria, Andre Martins, and Mário AT Figueiredo. Differentiable causal discovery under latent interventions. In *Conference on Causal Learning and Reasoning*, pages 253–274. PMLR, 2022.
- [15] Fan Feng, Biwei Huang, Kun Zhang, and Sara Magliacane. Factored adaptation for non-stationary reinforcement learning. In S. Koyejo, S. Mohamed, A. Agarwal, D. Belgrave, K. Cho, and A. Oh, editors, *Advances in Neural Information Processing Systems*, volume 35, pages 31957–31971. Curran Associates, Inc., 2022.
- [16] Ruili Feng, Han Zhang, Zhantao Yang, Jie Xiao, Zhilei Shu, Zhiheng Liu, Andy Zheng, Yukun Huang, Yu Liu, and Hongyang Zhang. The matrix: Infinite-horizon world generation with real-time moving control. *arXiv preprint arXiv:2412.03568*, 2024.

- [17] Xidong Feng, Yicheng Luo, Ziyang Wang, Hongrui Tang, Mengyue Yang, Kun Shao, David Mguni, Yali Du, and Jun Wang. Chessgpt: Bridging policy learning and language modeling. *Advances in Neural Information Processing Systems*, 36:7216–7262, 2023.
- [18] Anirudh Goyal, Alex Lamb, Phanideep Gampa, Philippe Beaudoin, Charles Blundell, Sergey Levine, Yoshua Bengio, and Michael Curtis Mozer. Factorizing declarative and procedural knowledge in structured, dynamical environments. In *International Conference on Learning Representations*, 2021.
- [19] Anirudh Goyal, Alex Lamb, Jordan Hoffmann, Shagun Sodhani, Sergey Levine, Yoshua Bengio, and Bernhard Schölkopf. Recurrent independent mechanisms. *arXiv preprint arXiv:1909.10893*, 2019.
- [20] Carlos Guestrin, Daphne Koller, Ronald Parr, and Shobha Venkataraman. Efficient solution algorithms for factored mdps. *Journal of Artificial Intelligence Research*, 19:399–468, 2003.
- [21] David Ha and Jürgen Schmidhuber. World models. *arXiv preprint arXiv:1803.10122*, 2018.
- [22] Danijar Hafner, Timothy Lillicrap, Jimmy Ba, and Mohammad Norouzi. Dream to control: Learning behaviors by latent imagination. *arXiv preprint arXiv:1912.01603*, 2019.
- [23] Danijar Hafner, Timothy Lillicrap, Mohammad Norouzi, and Jimmy Ba. Mastering atari with discrete world models. *arXiv preprint arXiv:2010.02193*, 2020.
- [24] Danijar Hafner, Jurgis Pasukonis, Jimmy Ba, and Timothy Lillicrap. Mastering diverse domains through world models. *arXiv preprint arXiv:2301.04104*, 2023.
- [25] Nicklas Hansen, Hao Su, and Xiaolong Wang. Td-mpc2: Scalable, robust world models for continuous control. *arXiv preprint arXiv:2310.16828*, 2023.
- [26] Nicklas Hansen, Xiaolong Wang, and Hao Su. Temporal difference learning for model predictive control. *arXiv preprint arXiv:2203.04955*, 2022.
- [27] Alain Hauser and Peter Bühlmann. Characterization and greedy learning of interventional markov equivalence classes of directed acyclic graphs. *The Journal of Machine Learning Research*, 13(1):2409–2464, 2012.
- [28] Alain Hauser and Peter Bühlmann. Jointly interventional and observational data: estimation of interventional markov equivalence classes of directed acyclic graphs. *Journal of the Royal Statistical Society Series B: Statistical Methodology*, 77(1):291–318, 2015.
- [29] Biwei Huang, Kun Zhang, Jiji Zhang, Joseph Ramsey, Ruben Sanchez-Romero, Clark Glymour, and Bernhard Schölkopf. Causal discovery from heterogeneous/nonstationary data. *Journal of Machine Learning Research*, 21(89):1–53, 2020.
- [30] Edward Hughes, Michael Dennis, Jack Parker-Holder, Feryal Behbahani, Aditi Mavalankar, Yuge Shi, Tom Schaul, and Tim Rocktaschel. Open-endedness is essential for artificial superhuman intelligence. *arXiv preprint arXiv:2406.04268*, 2024.
- [31] Inwoo Hwang, Yunhyeok Kwak, Suhyung Choi, Byoung-Tak Zhang, and Sanghack Lee. Fine-grained causal dynamics learning with quantization for improving robustness in reinforcement learning. *arXiv preprint arXiv:2406.03234*, 2024.
- [32] Inwoo Hwang, Yunhyeok Kwak, Yeon-Ji Song, Byoung-Tak Zhang, and Sanghack Lee. On discovery of local independence over continuous variables via neural contextual decomposition. In *Conference on Causal Learning and Reasoning*, pages 448–472. PMLR, 2023.
- [33] Antti Hyttinen, Frederick Eberhardt, and Matti Järvisalo. Constraint-based causal discovery: Conflict resolution with answer set programming. In *UAI*, pages 340–349, 2014.
- [34] Fateme Jamshidi, Sina Akbari, and Negar Kiyavash. Causal imitability under context-specific independence relations. *Advances in Neural Information Processing Systems*, 36:26810–26830, 2023.

- [35] Eric Jang, Shixiang Gu, and Ben Poole. Categorical reparameterization with gumbel-softmax. *arXiv preprint arXiv:1611.01144*, 2016.
- [36] Dominik Janzing and Bernhard Schölkopf. Causal inference using the algorithmic markov condition. *IEEE Transactions on Information Theory*, 56(10):5168–5194, 2010.
- [37] Jiarui Jin, Yuwei Wu, Haoxuan Li, Xiaoting He, Weinan Zhang, Yiming Yang, Yong Yu, Jun Wang, and Mengyue Yang. Large language models are demonstration pre-selectors for themselves. In *Forty-second International Conference on Machine Learning*, 2025.
- [38] Lukasz Kaiser, Mohammad Babaeizadeh, Piotr Milos, Blazej Osinski, Roy H Campbell, Konrad Czechowski, Dumitru Erhan, Chelsea Finn, Piotr Kozakowski, Sergey Levine, et al. Model-based reinforcement learning for atari. *arXiv preprint arXiv:1903.00374*, 2019.
- [39] Nan Rosemary Ke, Aniket Didolkar, Sarthak Mittal, Anirudh Goyal, Guillaume Lajoie, Stefan Bauer, Danilo Rezende, Yoshua Bengio, Michael Mozer, and Christopher Pal. Systematic evaluation of causal discovery in visual model based reinforcement learning. *arXiv preprint arXiv:2107.00848*, 2021.
- [40] Thomas Kipf, Elise Van der Pol, and Max Welling. Contrastive learning of structured world models. *arXiv preprint arXiv:1911.12247*, 2019.
- [41] Abhinav Kumar and Gaurav Sinha. Disentangling mixtures of unknown causal interventions. In *Uncertainty in Artificial Intelligence*, pages 2093–2102. PMLR, 2021.
- [42] Tobias Lang, Marc Toussaint, and Kristian Kersting. Exploration in relational domains for model-based reinforcement learning. *The Journal of Machine Learning Research*, 13(1):3725–3768, 2012.
- [43] Anson Lei, Bernhard Schölkopf, and Ingmar Posner. Causal discovery for modular world models. In *NeurIPS 2022 Workshop on Neuro Causal and Symbolic AI (nCSI)*, 2022.
- [44] Yunzhu Li, Antonio Torralba, Anima Anandkumar, Dieter Fox, and Animesh Garg. Causal discovery in physical systems from videos. *Advances in Neural Information Processing Systems*, 33:9180–9192, 2020.
- [45] Haohong Lin, Wenhao Ding, Jian Chen, Laixi Shi, Jiacheng Zhu, Bo Li, and Ding Zhao. Because: Bilinear causal representation for generalizable offline model-based reinforcement learning. *arXiv preprint arXiv:2407.10967*, 2024.
- [46] Phillip Lippe, Sara Magliacane, Sindy Löwe, Yuki M Asano, Taco Cohen, and Efstratios Gavves. BISCUIT: Causal representation learning from binary interactions. In Robin J. Evans and Ilya Shpitser, editors, *Proceedings of the Thirty-Ninth Conference on Uncertainty in Artificial Intelligence*, volume 216 of *Proceedings of Machine Learning Research*, pages 1263–1273. PMLR, 31 Jul–04 Aug 2023.
- [47] Yuren Liu, Biwei Huang, Zhengmao Zhu, Honglong Tian, Mingming Gong, Yang Yu, and Kun Zhang. Learning world models with identifiable factorization. In A. Oh, T. Naumann, A. Globerson, K. Saenko, M. Hardt, and S. Levine, editors, *Advances in Neural Information Processing Systems*, volume 36, pages 31831–31864. Curran Associates, Inc., 2023.
- [48] Francesco Locatello, Ben Poole, Gunnar Rätsch, Bernhard Schölkopf, Olivier Bachem, and Michael Tschannen. Weakly-supervised disentanglement without compromises. In *International conference on machine learning*, pages 6348–6359. PMLR, 2020.
- [49] Sindy Löwe, David Madras, Richard Zemel, and Max Welling. Amortized causal discovery: Learning to infer causal graphs from time-series data. In *Conference on Causal Learning and Reasoning*, pages 509–525. PMLR, 2022.
- [50] Chris J Maddison, Andriy Mnih, and Yee Whye Teh. The concrete distribution: A continuous relaxation of discrete random variables. *arXiv preprint arXiv:1611.00712*, 2016.
- [51] Christopher Meek. *Graphical Models: Selecting causal and statistical models*. PhD thesis, Carnegie Mellon University, 1997.

- [52] Nicolai Meinshausen, Alain Hauser, Joris M Mooij, Jonas Peters, Philip Versteeg, and Peter Bühlmann. Methods for causal inference from gene perturbation experiments and validation. *Proceedings of the National Academy of Sciences*, 113(27):7361–7368, 2016.
- [53] Vincent Micheli, Eloi Alonso, and François Fleuret. Transformers are sample-efficient world models. *arXiv preprint arXiv:2209.00588*, 2022.
- [54] Vincent Micheli, Eloi Alonso, and François Fleuret. Efficient world models with context-aware tokenization. *arXiv preprint arXiv:2406.19320*, 2024.
- [55] Tim Pearce, Tabish Rashid, Dave Bignell, Raluca Georgescu, Sam Devlin, and Katja Hofmann. Scaling laws for pre-training agents and world models. *arXiv preprint arXiv:2411.04434*, 2024.
- [56] Judea Pearl. *Causality*. Cambridge university press, 2009.
- [57] Silviu Pitis, Elliot Creager, and Animesh Garg. Counterfactual data augmentation using locally factored dynamics. *Advances in Neural Information Processing Systems*, 33:3976–3990, 2020.
- [58] Silviu Pitis, Elliot Creager, Ajay Mandlekar, and Animesh Garg. Mocoda: Model-based counterfactual data augmentation. *Advances in Neural Information Processing Systems*, 35:18143–18156, 2022.
- [59] Jonathan Richens and Tom Everitt. Robust agents learn causal world models. In *The Twelfth International Conference on Learning Representations*, 2024.
- [60] Stéphane Ross and Joelle Pineau. Model-based bayesian reinforcement learning in large structured domains. In *Uncertainty in artificial intelligence: proceedings of the... conference. Conference on Uncertainty in Artificial Intelligence*, volume 2008, page 476, 2008.
- [61] Reuven Y Rubinstein and Dirk P Kroese. *The cross-entropy method: a unified approach to combinatorial optimization, Monte-Carlo simulation and machine learning*. Springer Science & Business Media, 2004.
- [62] Jürgen Schmidhuber. *Making the world differentiable: on using self supervised fully recurrent neural networks for dynamic reinforcement learning and planning in non-stationary environments*, volume 126. Inst. für Informatik, 1990.
- [63] Jürgen Schmidhuber. Gödel machines: Fully self-referential optimal universal self-improvers. In *Artificial general intelligence*, pages 199–226. Springer, 2007.
- [64] Bernhard Schölkopf, Francesco Locatello, Stefan Bauer, Nan Rosemary Ke, Nal Kalchbrenner, Anirudh Goyal, and Yoshua Bengio. Toward causal representation learning. *Proceedings of the IEEE*, 109(5):612–634, 2021.
- [65] Julian Schrittwieser, Ioannis Antonoglou, Thomas Hubert, Karen Simonyan, Laurent Sifre, Simon Schmitt, Arthur Guez, Edward Lockhart, Demis Hassabis, Thore Graepel, et al. Mastering atari, go, chess and shogi by planning with a learned model. *Nature*, 588(7839):604–609, 2020.
- [66] Maximilian Seitzer, Bernhard Schölkopf, and Georg Martius. Causal influence detection for improving efficiency in reinforcement learning. *Advances in Neural Information Processing Systems*, 34:22905–22918, 2021.
- [67] Sumedh A Sontakke, Arash Mehrjou, Laurent Itti, and Bernhard Schölkopf. Causal curiosity: RL agents discovering self-supervised experiments for causal representation learning. In *International conference on machine learning*, pages 9848–9858. PMLR, 2021.
- [68] Peter Spirtes, Clark N Glymour, and Richard Scheines. *Causation, prediction, and search*. MIT press, 2000.
- [69] Chandler Squires, Yuhao Wang, and Caroline Uhler. Permutation-based causal structure learning with unknown intervention targets. In *Conference on Uncertainty in Artificial Intelligence*, pages 1039–1048. PMLR, 2020.
- [70] Richard S Sutton. Dyna, an integrated architecture for learning, planning, and reacting. *ACM Sigart Bulletin*, 2(4):160–163, 1991.

- [71] Manan Tomar, Amy Zhang, Roberto Calandra, Matthew E Taylor, and Joelle Pineau. Model-invariant state abstractions for model-based reinforcement learning. *arXiv preprint arXiv:2102.09850*, 2021.
- [72] Sofia Triantafillou and Ioannis Tsamardinos. Constraint-based causal discovery from multiple interventions over overlapping variable sets. *The Journal of Machine Learning Research*, 16(1):2147–2205, 2015.
- [73] Núria Armengol Urpí, Marco Bagatella, Marin Vlastelica, and Georg Martius. Causal action influence aware counterfactual data augmentation. *arXiv preprint arXiv:2405.18917*, 2024.
- [74] Aaron Van Den Oord, Oriol Vinyals, et al. Neural discrete representation learning. *Advances in neural information processing systems*, 30, 2017.
- [75] Zizhao Wang, Jiaheng Hu, Peter Stone, and Roberto Martín-Martín. Elden: Exploration via local dependencies. *Advances in Neural Information Processing Systems*, 36:15456–15474, 2023.
- [76] Zizhao Wang, Caroline Wang, Xuesu Xiao, Yuke Zhu, and Peter Stone. Building minimal and reusable causal state abstractions for reinforcement learning. In *Proceedings of the AAAI Conference on Artificial Intelligence*, volume 38, pages 15778–15786, 2024.
- [77] Zizhao Wang, Xuesu Xiao, Zifan Xu, Yuke Zhu, and Peter Stone. Causal dynamics learning for task-independent state abstraction. *arXiv preprint arXiv:2206.13452*, 2022.
- [78] Mengyue Yang, Quanyu Dai, Zhenhua Dong, Xu Chen, Xiuqiang He, and Jun Wang. Top-n recommendation with counterfactual user preference simulation. *CIKM '21*, page 2342–2351, 2021.
- [79] Mengyue Yang, Zhen Fang, Yonggang Zhang, Yali Du, Furui Liu, Jean-Francois Ton, Jianhong Wang, and Jun Wang. Invariant learning via probability of sufficient and necessary causes. In A. Oh, T. Naumann, A. Globerson, K. Saenko, M. Hardt, and S. Levine, editors, *Advances in Neural Information Processing Systems*, pages 79832–79857, 2023.
- [80] Mengyue Yang, Furui Liu, Zhitang Chen, Xinwei Shen, Jianye Hao, and Jun Wang. Causalvae: Disentangled representation learning via neural structural causal models. In *Proceedings of the IEEE/CVF Conference on Computer Vision and Pattern Recognition*, June 2021.
- [81] Weiran Yao, Guangyi Chen, and Kun Zhang. Learning latent causal dynamics. *arXiv preprint arXiv:2202.04828*, 2022.
- [82] Zhongwei Yu, Jingqing Ruan, and Dengpeng Xing. Learning causal dynamics models in object-oriented environments. *arXiv preprint arXiv:2405.12615*, 2024.
- [83] Amy Zhang, Zachary C Lipton, Luis Pineda, Kamyar Azizzadenesheli, Anima Anandkumar, Laurent Itti, Joelle Pineau, and Tommaso Furlanello. Learning causal state representations of partially observable environments. *arXiv preprint arXiv:1906.10437*, 2019.

## NeurIPS Paper Checklist

### 1. Claims

Question: Do the main claims made in the abstract and introduction accurately reflect the paper's contributions and scope?

Answer: [\[Yes\]](#)

Justification: The main claims presented in the abstract and introduction accurately reflect the scope and contributions of our work, which are supported by Section 3 and Section 6.

Guidelines:

- The answer NA means that the abstract and introduction do not include the claims made in the paper.
- The abstract and/or introduction should clearly state the claims made, including the contributions made in the paper and important assumptions and limitations. A No or NA answer to this question will not be perceived well by the reviewers.
- The claims made should match theoretical and experimental results, and reflect how much the results can be expected to generalize to other settings.
- It is fine to include aspirational goals as motivation as long as it is clear that these goals are not attained by the paper.

### 2. Limitations

Question: Does the paper discuss the limitations of the work performed by the authors?

Answer: [\[Yes\]](#)

Justification: We explicitly discuss limitations in Section 7.

Guidelines:

- The answer NA means that the paper has no limitation while the answer No means that the paper has limitations, but those are not discussed in the paper.
- The authors are encouraged to create a separate "Limitations" section in their paper.
- The paper should point out any strong assumptions and how robust the results are to violations of these assumptions (e.g., independence assumptions, noiseless settings, model well-specification, asymptotic approximations only holding locally). The authors should reflect on how these assumptions might be violated in practice and what the implications would be.
- The authors should reflect on the scope of the claims made, e.g., if the approach was only tested on a few datasets or with a few runs. In general, empirical results often depend on implicit assumptions, which should be articulated.
- The authors should reflect on the factors that influence the performance of the approach. For example, a facial recognition algorithm may perform poorly when image resolution is low or images are taken in low lighting. Or a speech-to-text system might not be used reliably to provide closed captions for online lectures because it fails to handle technical jargon.
- The authors should discuss the computational efficiency of the proposed algorithms and how they scale with dataset size.
- If applicable, the authors should discuss possible limitations of their approach to address problems of privacy and fairness.
- While the authors might fear that complete honesty about limitations might be used by reviewers as grounds for rejection, a worse outcome might be that reviewers discover limitations that aren't acknowledged in the paper. The authors should use their best judgment and recognize that individual actions in favor of transparency play an important role in developing norms that preserve the integrity of the community. Reviewers will be specifically instructed to not penalize honesty concerning limitations.

### 3. Theory assumptions and proofs

Question: For each theoretical result, does the paper provide the full set of assumptions and a complete (and correct) proof?



Answer: [\[Yes\]](#)

Justification: We provide complete proofs for all theoretical results in Section 3. For Theorem 1 and Theorem 2, we state the key assumption (Assumption 1) and provide detailed proofs in Appendix A. Similarly, for Proposition 1 on subgraph identifiability, we list all assumptions and include complete proofs.

Guidelines:

- The answer NA means that the paper does not include theoretical results.
- All the theorems, formulas, and proofs in the paper should be numbered and cross-referenced.
- All assumptions should be clearly stated or referenced in the statement of any theorems.
- The proofs can either appear in the main paper or the supplemental material, but if they appear in the supplemental material, the authors are encouraged to provide a short proof sketch to provide intuition.
- Inversely, any informal proof provided in the core of the paper should be complemented by formal proofs provided in appendix or supplemental material.
- Theorems and Lemmas that the proof relies upon should be properly referenced.

#### 4. Experimental result reproducibility

Question: Does the paper fully disclose all the information needed to reproduce the main experimental results of the paper to the extent that it affects the main claims and/or conclusions of the paper (regardless of whether the code and data are provided or not)?

Answer: [\[Yes\]](#)

Justification: The paper includes all necessary information for reproduction, including the algorithm pipeline 1, the experimental setup, and the hyperparameters used in the experiments.

Guidelines:

- The answer NA means that the paper does not include experiments.
- If the paper includes experiments, a No answer to this question will not be perceived well by the reviewers: Making the paper reproducible is important, regardless of whether the code and data are provided or not.
- If the contribution is a dataset and/or model, the authors should describe the steps taken to make their results reproducible or verifiable.
- Depending on the contribution, reproducibility can be accomplished in various ways. For example, if the contribution is a novel architecture, describing the architecture fully might suffice, or if the contribution is a specific model and empirical evaluation, it may be necessary to either make it possible for others to replicate the model with the same dataset, or provide access to the model. In general, releasing code and data is often one good way to accomplish this, but reproducibility can also be provided via detailed instructions for how to replicate the results, access to a hosted model (e.g., in the case of a large language model), releasing of a model checkpoint, or other means that are appropriate to the research performed.
- While NeurIPS does not require releasing code, the conference does require all submissions to provide some reasonable avenue for reproducibility, which may depend on the nature of the contribution. For example
  - (a) If the contribution is primarily a new algorithm, the paper should make it clear how to reproduce that algorithm.
  - (b) If the contribution is primarily a new model architecture, the paper should describe the architecture clearly and fully.
  - (c) If the contribution is a new model (e.g., a large language model), then there should either be a way to access this model for reproducing the results or a way to reproduce the model (e.g., with an open-source dataset or instructions for how to construct the dataset).
  - (d) We recognize that reproducibility may be tricky in some cases, in which case authors are welcome to describe the particular way they provide for reproducibility. In the case of closed-source models, it may be that access to the model is limited in

some way (e.g., to registered users), but it should be possible for other researchers to have some path to reproducing or verifying the results.

## 5. Open access to data and code

Question: Does the paper provide open access to the data and code, with sufficient instructions to faithfully reproduce the main experimental results, as described in supplemental material?

Answer: [Yes]

Justification: We use publicly open source environments and release code in the supplementary file.

Guidelines:

- The answer NA means that paper does not include experiments requiring code.
- Please see the NeurIPS code and data submission guidelines (<https://nips.cc/public/guides/CodeSubmissionPolicy>) for more details.
- While we encourage the release of code and data, we understand that this might not be possible, so "No" is an acceptable answer. Papers cannot be rejected simply for not including code, unless this is central to the contribution (e.g., for a new open-source benchmark).
- The instructions should contain the exact command and environment needed to run to reproduce the results. See the NeurIPS code and data submission guidelines (<https://nips.cc/public/guides/CodeSubmissionPolicy>) for more details.
- The authors should provide instructions on data access and preparation, including how to access the raw data, preprocessed data, intermediate data, and generated data, etc.
- The authors should provide scripts to reproduce all experimental results for the new proposed method and baselines. If only a subset of experiments are reproducible, they should state which ones are omitted from the script and why.
- At submission time, to preserve anonymity, the authors should release anonymized versions (if applicable).
- Providing as much information as possible in supplemental material (appended to the paper) is recommended, but including URLs to data and code is permitted.

## 6. Experimental setting/details

Question: Does the paper specify all the training and test details (e.g., data splits, hyperparameters, how they were chosen, type of optimizer, etc.) necessary to understand the results?

Answer: [Yes]

Justification: We provide all the necessary details in Section 6 and Appendix B, including hyperparameters and the type of optimizer used.

Guidelines:

- The answer NA means that the paper does not include experiments.
- The experimental setting should be presented in the core of the paper to a level of detail that is necessary to appreciate the results and make sense of them.
- The full details can be provided either with the code, in appendix, or as supplemental material.

## 7. Experiment statistical significance

Question: Does the paper report error bars suitably and correctly defined or other appropriate information about the statistical significance of the experiments?

Answer: [Yes]

Justification: We report the mean and standard deviation of prediction accuracy and standard deviation, and we provide the necessary information to understand how they were computed.

Guidelines:

- The answer NA means that the paper does not include experiments.

- The authors should answer "Yes" if the results are accompanied by error bars, confidence intervals, or statistical significance tests, at least for the experiments that support the main claims of the paper.
- The factors of variability that the error bars are capturing should be clearly stated (for example, train/test split, initialization, random drawing of some parameter, or overall run with given experimental conditions).
- The method for calculating the error bars should be explained (closed form formula, call to a library function, bootstrap, etc.)
- The assumptions made should be given (e.g., Normally distributed errors).
- It should be clear whether the error bar is the standard deviation or the standard error of the mean.
- It is OK to report 1-sigma error bars, but one should state it. The authors should preferably report a 2-sigma error bar than state that they have a 96% CI, if the hypothesis of Normality of errors is not verified.
- For asymmetric distributions, the authors should be careful not to show in tables or figures symmetric error bars that would yield results that are out of range (e.g. negative error rates).
- If error bars are reported in tables or plots, The authors should explain in the text how they were calculated and reference the corresponding figures or tables in the text.

## 8. Experiments compute resources

Question: For each experiment, does the paper provide sufficient information on the computer resources (type of compute workers, memory, time of execution) needed to reproduce the experiments?

Answer: [Yes]

Justification: We provide the necessary information about the compute resources used in our experiments in Appendix B.

Guidelines:

- The answer NA means that the paper does not include experiments.
- The paper should indicate the type of compute workers CPU or GPU, internal cluster, or cloud provider, including relevant memory and storage.
- The paper should provide the amount of compute required for each of the individual experimental runs as well as estimate the total compute.
- The paper should disclose whether the full research project required more compute than the experiments reported in the paper (e.g., preliminary or failed experiments that didn't make it into the paper).

## 9. Code of ethics

Question: Does the research conducted in the paper conform, in every respect, with the NeurIPS Code of Ethics <https://neurips.cc/public/EthicsGuidelines>?

Answer: [Yes]

Justification: We have reviewed and fully adhered to the NeurIPS Code of Ethics throughout the research process.

Guidelines:

- The answer NA means that the authors have not reviewed the NeurIPS Code of Ethics.
- If the authors answer No, they should explain the special circumstances that require a deviation from the Code of Ethics.
- The authors should make sure to preserve anonymity (e.g., if there is a special consideration due to laws or regulations in their jurisdiction).

## 10. Broader impacts

Question: Does the paper discuss both potential positive societal impacts and negative societal impacts of the work performed?

Answer: [NA]

Justification: This work is primarily methodological and does not have direct societal impacts.

Guidelines:

- The answer NA means that there is no societal impact of the work performed.
- If the authors answer NA or No, they should explain why their work has no societal impact or why the paper does not address societal impact.
- Examples of negative societal impacts include potential malicious or unintended uses (e.g., disinformation, generating fake profiles, surveillance), fairness considerations (e.g., deployment of technologies that could make decisions that unfairly impact specific groups), privacy considerations, and security considerations.
- The conference expects that many papers will be foundational research and not tied to particular applications, let alone deployments. However, if there is a direct path to any negative applications, the authors should point it out. For example, it is legitimate to point out that an improvement in the quality of generative models could be used to generate deepfakes for disinformation. On the other hand, it is not needed to point out that a generic algorithm for optimizing neural networks could enable people to train models that generate Deepfakes faster.
- The authors should consider possible harms that could arise when the technology is being used as intended and functioning correctly, harms that could arise when the technology is being used as intended but gives incorrect results, and harms following from (intentional or unintentional) misuse of the technology.
- If there are negative societal impacts, the authors could also discuss possible mitigation strategies (e.g., gated release of models, providing defenses in addition to attacks, mechanisms for monitoring misuse, mechanisms to monitor how a system learns from feedback over time, improving the efficiency and accessibility of ML).

#### 11. Safeguards

Question: Does the paper describe safeguards that have been put in place for responsible release of data or models that have a high risk for misuse (e.g., pretrained language models, image generators, or scraped datasets)?

Answer: [NA]

Justification: This work does not involve the release of data or models that have a high risk for misuse.

Guidelines:

- The answer NA means that the paper poses no such risks.
- Released models that have a high risk for misuse or dual-use should be released with necessary safeguards to allow for controlled use of the model, for example by requiring that users adhere to usage guidelines or restrictions to access the model or implementing safety filters.
- Datasets that have been scraped from the Internet could pose safety risks. The authors should describe how they avoided releasing unsafe images.
- We recognize that providing effective safeguards is challenging, and many papers do not require this, but we encourage authors to take this into account and make a best faith effort.

#### 12. Licenses for existing assets

Question: Are the creators or original owners of assets (e.g., code, data, models), used in the paper, properly credited and are the license and terms of use explicitly mentioned and properly respected?

Answer: [Yes]

Justification: All assets used in this work, including datasets, code, and models, are publicly available. We have properly credited the original creators and ensured that all licenses and terms of use are respected.

Guidelines:

- The answer NA means that the paper does not use existing assets.

- The authors should cite the original paper that produced the code package or dataset.
- The authors should state which version of the asset is used and, if possible, include a URL.
- The name of the license (e.g., CC-BY 4.0) should be included for each asset.
- For scraped data from a particular source (e.g., website), the copyright and terms of service of that source should be provided.
- If assets are released, the license, copyright information, and terms of use in the package should be provided. For popular datasets, [paperswithcode.com/datasets](https://paperswithcode.com/datasets) has curated licenses for some datasets. Their licensing guide can help determine the license of a dataset.
- For existing datasets that are re-packaged, both the original license and the license of the derived asset (if it has changed) should be provided.
- If this information is not available online, the authors are encouraged to reach out to the asset's creators.

### 13. **New assets**

Question: Are new assets introduced in the paper well documented and is the documentation provided alongside the assets?

Answer: [\[Yes\]](#)

Justification: We release the code used in this work, and we provide detailed documentation on how to use them.

Guidelines:

- The answer NA means that the paper does not release new assets.
- Researchers should communicate the details of the dataset/code/model as part of their submissions via structured templates. This includes details about training, license, limitations, etc.
- The paper should discuss whether and how consent was obtained from people whose asset is used.
- At submission time, remember to anonymize your assets (if applicable). You can either create an anonymized URL or include an anonymized zip file.

### 14. **Crowdsourcing and research with human subjects**

Question: For crowdsourcing experiments and research with human subjects, does the paper include the full text of instructions given to participants and screenshots, if applicable, as well as details about compensation (if any)?

Answer: [\[NA\]](#)

Justification: This work does not involve crowdsourcing or research with human subjects.

Guidelines:

- The answer NA means that the paper does not involve crowdsourcing nor research with human subjects.
- Including this information in the supplemental material is fine, but if the main contribution of the paper involves human subjects, then as much detail as possible should be included in the main paper.
- According to the NeurIPS Code of Ethics, workers involved in data collection, curation, or other labor should be paid at least the minimum wage in the country of the data collector.

### 15. **Institutional review board (IRB) approvals or equivalent for research with human subjects**

Question: Does the paper describe potential risks incurred by study participants, whether such risks were disclosed to the subjects, and whether Institutional Review Board (IRB) approvals (or an equivalent approval/review based on the requirements of your country or institution) were obtained?

Answer: [\[NA\]](#)

Justification: This paper does not involve crowdsourcing nor research with human subjects.

Guidelines:

- The answer NA means that the paper does not involve crowdsourcing nor research with human subjects.
- Depending on the country in which research is conducted, IRB approval (or equivalent) may be required for any human subjects research. If you obtained IRB approval, you should clearly state this in the paper.
- We recognize that the procedures for this may vary significantly between institutions and locations, and we expect authors to adhere to the NeurIPS Code of Ethics and the guidelines for their institution.
- For initial submissions, do not include any information that would break anonymity (if applicable), such as the institution conducting the review.

**16. Declaration of LLM usage**

Question: Does the paper describe the usage of LLMs if it is an important, original, or non-standard component of the core methods in this research? Note that if the LLM is used only for writing, editing, or formatting purposes and does not impact the core methodology, scientific rigorousness, or originality of the research, declaration is not required.

Answer: [NA]

Justification: LLMs are used in this paper solely for text polishing.

Guidelines:

- The answer NA means that the core method development in this research does not involve LLMs as any important, original, or non-standard components.
- Please refer to our LLM policy (<https://neurips.cc/Conferences/2025/LLM>) for what should or should not be described.

## A Theoretical Analysis and Discussion

This section establishes the theoretical foundations for identifying meta states and their corresponding causal subgraphs within our proposed framework. We present a comprehensive analysis of identifiability conditions under two distinct scenarios: swap-label equivalence and observational equivalence. The former addresses cases where meta states can be permuted without altering the underlying causal structure, while the latter examines situations involving overparameterization where the learned model contains more meta states than the ground truth. Additionally, we introduce intervention reachability to formalize which causal relationships are identifiable via feasible interventions.

### A.1 Summary of Key Results

Our theoretical analysis yields key results on the identifiability of meta states and causal structures:

**Swap-Label Equivalence:** Under Assumption 1, we demonstrate that the learned mapping function is swap-label equivalent to the ground truth mapping (Theorem 1). This equivalence ensures that while the specific labels assigned to meta states may differ between learned and ground truth mappings, the underlying causal relationships remain preserved. The proof demonstrates that any departure from this equivalence leads to higher L1 norm of causal skeleton matrices and thus contradicts the optimality principle underlying our framework.

**Observational Equivalence:** For overparameterized scenarios where the learned model contains more meta states than the ground truth, we prove that observational equivalence is maintained (Theorem 2). This result demonstrates that introducing additional meta states does not compromise the recovery of true causal relationships, since the learned mapping consistently preserves the same causal skeleton matrices across all states.

**Intervention Reachability:** We formalize the mathematical framework for determining which interventions are feasible given environmental constraints. Through matrix representations of state transitions and intervention capabilities, we establish conditions under which specific causal relationships can be identified through sequential interventions (Theorem 3). This analysis provides practical guidance for experimental design in causal discovery.

**Structural Assumptions:** Our results rely on Assumption 1, which posits that learning from mixed datasets yields causal graphs encompassing the union of all contributing causal relationships. This assumption is both theoretically justified and practically reasonable, as it ensures comprehensive coverage of causal dependencies present in heterogeneous data sources.

The theoretical framework presented in this section provides rigorous guarantees for the identifiability of causal structures while accommodating practical constraints inherent in real-world applications, thereby establishing the soundness of our proposed methodology.

### A.2 Swap-Label Equivalence

In the context of Meta-Causal Graphs, swap-label equivalence captures the invariance of causal structure under permutation of meta state labels. This phenomenon arises when different labelings of meta states yield identical causal relationships across the state space.

Consider a Meta-Causal Graph  $G$  with meta states  $\{u_1, u_2\}$  and corresponding causal subgraphs  $\{M_{u_1}, M_{u_2}\}$ , as illustrated in Figure 6a. An alternative Meta-Causal Graph  $\hat{G}$  with meta states  $\{\hat{u}_1, \hat{u}_2\}$  and subgraphs  $\{\hat{M}_{\hat{u}_1}, \hat{M}_{\hat{u}_2}\}$  is shown in Figure 6b.

Two mappings  $C : \mathcal{X} \rightarrow U$  and  $\hat{C} : \mathcal{X} \rightarrow \hat{U}$  are swap-label equivalent if there exists a bijection  $g : U \rightarrow \hat{U}$  such that for any state  $x \in \mathcal{X}$ , the causal skeleton matrices satisfy:

$$M_{C(x)} = \hat{M}_{g(C(x))} = \hat{M}_{\hat{C}(x)}$$

This equivalence ensures that the learned mapping  $\hat{C}$  preserves the same causal structure as the ground truth mapping  $C$ , despite potentially different meta state assignments. As illustrated in Figure 6, such permutations preserve the fundamental causal relationships within the Meta-Causal Graph.

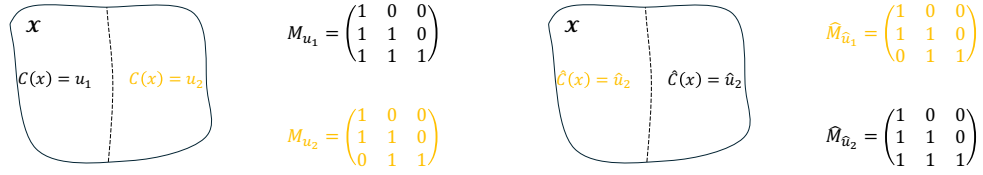

(a) Two meta states  $(u_1, u_2)$  with corresponding subgraphs  $M_{u_1}$  and  $M_{u_2}$ .

(b) Label-swapped meta states  $(\hat{u}_1, \hat{u}_2)$  with corresponding subgraphs  $\hat{M}_{\hat{u}_1}$  and  $\hat{M}_{\hat{u}_2}$ .

Figure 6: **Swap-label equivalence in Meta-Causal Graphs.** Left: Ground truth Meta-Causal Graph with meta states  $\{u_1, u_2\}$  and corresponding causal subgraphs  $\{M_{u_1}, M_{u_2}\}$ . Right: Learned Meta-Causal Graph with meta states  $\{\hat{u}_1, \hat{u}_2\}$  and subgraphs  $\{\hat{M}_{\hat{u}_1}, \hat{M}_{\hat{u}_2}\}$ . Despite different meta state labels, both mappings produce identical causal skeleton matrices for any state  $x \in \mathcal{X}$ , demonstrating structural equivalence under label permutation.

### A.3 Proof of Theorem 1

*Proof.* Consider the reconstruction objective for learning causal skeleton matrices from mixed data. For any clustering  $\hat{C} : \mathcal{X} \rightarrow \hat{\mathcal{U}}$ , let  $\hat{M}_{\hat{u}}$  denote the learned skeleton matrix for meta state  $\hat{u}$ . Under Assumption 1, this matrix satisfies:

$$\hat{M}_{\hat{u}}[i, j] = \mathbb{I} \left[ \bigcup_{x: \hat{C}(x) = \hat{u}} M_{C(x)}[i, j] = 1 \right]$$

Now consider two cases:

**Case 1:**  $\hat{C}$  perfectly aligns with  $C$  up to label permutation. Then there exists a bijection  $g : \mathcal{U} \rightarrow \hat{\mathcal{U}}$  such that  $\hat{C}(x) = g(C(x))$  for all  $x \in \mathcal{X}$ . In this case,  $\hat{M}_{g(u)} = M_u$  for each  $u \in \mathcal{U}$ , achieving perfect reconstruction of individual causal structures.

**Case 2:**  $\hat{C}$  merges states from different true meta states. Then there exist  $x_1, x_2 \in \mathcal{X}$  with  $C(x_1) = u_1 \neq u_2 = C(x_2)$  but  $\hat{C}(x_1) = \hat{C}(x_2) = \hat{u}$ . By Assumption 1:

$$\hat{M}_{\hat{u}} = M_{u_1} \cup M_{u_2}$$

where  $\cup$  denotes element-wise logical OR. Since  $M_{u_1} \neq M_{u_2}$ , we have  $\hat{M}_{\hat{u}} \neq M_{u_1}$  and  $\hat{M}_{\hat{u}} \neq M_{u_2}$ .

Let  $\|\cdot\|_1$  denote the L1 norm. For binary matrices,  $\|M\|_1$  equals the number of edges in the corresponding causal graph. Since the union operation can only add edges (never remove them), we have:

$$\|\hat{M}_{\hat{u}}\|_1 = \|M_{u_1} \cup M_{u_2}\|_1 \geq \max\{\|M_{u_1}\|_1, \|M_{u_2}\|_1\}$$

Moreover, since  $M_{u_1} \neq M_{u_2}$ , there exists at least one position  $(i, j)$  where  $M_{u_1}[i, j] \neq M_{u_2}[i, j]$ .

$$\|\hat{M}_{\hat{u}}\|_1 > \|M_{u_1}\|_1 \quad \text{and} \quad \|\hat{M}_{\hat{u}}\|_1 > \|M_{u_2}\|_1$$

Consider the expected L1 norm under each partition. For the true partition  $C$ :

$$\mathbb{E}_{x \sim \mathcal{X}}[\|M_{C(x)}\|_1] = \sum_{u \in \mathcal{U}} P(C(x) = u) \cdot \|M_u\|_1$$

For the suboptimal partition  $\hat{C}$  that merges distinct meta states:

$$\mathbb{E}_{x \sim \mathcal{X}}[\|\hat{M}_{\hat{C}(x)}\|_1] = \sum_{\hat{u} \in \hat{\mathcal{U}}} P(\hat{C}(x) = \hat{u}) \cdot \|\hat{M}_{\hat{u}}\|_1$$

Since merging increases the L1 norm (as shown above), and each merged cluster  $\hat{u}$  has  $\|\hat{M}_{\hat{u}}\|_1 > \|M_u\|_1$  for the constituent true meta states  $u$ , we have:

$$\mathbb{E}_{x \sim \mathcal{X}}[\|\hat{M}_{\hat{C}(x)}\|_1] > \mathbb{E}_{x \sim \mathcal{X}}[\|M_{C(x)}\|_1]$$

□



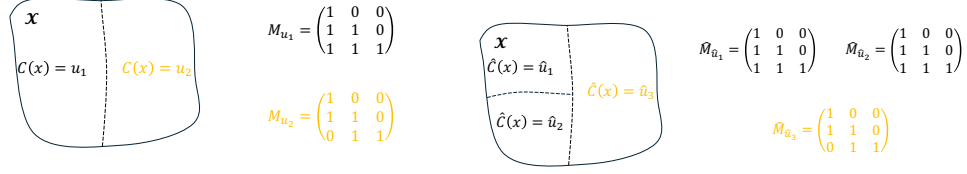

(a) Two meta states: partition (left) and Meta-Causal Graph (right). (b) Three meta states: partition (left) and Meta-Causal Graph (right).

Figure 7: **Observational equivalence under overparameterization.** Left: Ground truth Meta-Causal Graph with meta states  $\{u_1, u_2\}$  and causal subgraphs  $\{M_{u_1}, M_{u_2}\}$ . Right: Overparameterized Meta-Causal Graph with three meta states  $\{\hat{u}_1, \hat{u}_2, \hat{u}_3\}$  and subgraphs  $\{\hat{M}_{\hat{u}_1}, \hat{M}_{\hat{u}_2}, \hat{M}_{\hat{u}_3}\}$ . Despite the additional meta state, both mappings produce identical causal skeleton matrices for any state  $x \in \mathcal{X}$ , demonstrating that overparameterization preserves causal structure.

#### A.4 Observational Equivalence

Observational equivalence captures scenarios where learned meta state mappings preserve causal structure despite overparameterization. Formally, two mappings  $C : \mathcal{X} \rightarrow U$  and  $\hat{C} : \mathcal{X} \rightarrow \hat{U}$  are observationally equivalent if for every state  $x \in \mathcal{X}$ :  $M_{C(x)} = \hat{M}_{\hat{C}(x)}$ , where  $M_{C(x)}$  and  $\hat{M}_{\hat{C}(x)}$  are the causal skeleton matrices corresponding to the assigned meta states. This equivalence ensures that the learned mapping  $\hat{C}$  captures identical causal relationships as the ground truth mapping  $C$ , even when the learned meta state space  $\hat{U}$  is larger than the true space  $U$ . Overparameterization may result in redundant meta states, but the essential causal structure remains preserved.

Figure 7 illustrates this concept. Left: Ground truth Meta-Causal Graph with meta states  $\{u_1, u_2\}$  and subgraphs  $\{M_{u_1}, M_{u_2}\}$ . Right: Learned overparameterized Meta-Causal Graph with three meta states  $\{\hat{u}_1, \hat{u}_2, \hat{u}_3\}$  and corresponding subgraphs  $\{\hat{M}_{\hat{u}_1}, \hat{M}_{\hat{u}_2}, \hat{M}_{\hat{u}_3}\}$ . Despite having an additional meta state, both mappings yield identical causal skeleton matrices for any given state  $x \in \mathcal{X}$ , demonstrating observational equivalence under overparameterization.

#### A.5 Proof of Theorem 2

*Proof.* We prove that despite overparameterization, the learned mapping preserves the causal structure of the ground truth mapping.

Let  $\hat{U}_{\text{active}} = \{\hat{u} \in \hat{U} : \exists x \in \mathcal{X} \text{ s.t. } \hat{C}(x) = \hat{u}\}$  denote the set of meta states that are actually assigned to some state in  $\mathcal{X}$ .

**Step 1:** We first establish that the learned mapping cannot merge distinct true meta states. Suppose for contradiction that there exist  $x_1, x_2 \in \mathcal{X}$  such that:

$$C(x_1) = u_1 \neq u_2 = C(x_2) \quad \text{but} \quad \hat{C}(x_1) = \hat{C}(x_2) = \hat{u}$$

By Assumption 1, the learned causal skeleton matrix would be:

$$\hat{M}_{\hat{u}} = M_{u_1} \cup M_{u_2}$$

Since  $M_{u_1} \neq M_{u_2}$ , we have  $\|\hat{M}_{\hat{u}}\|_1 > \max\{\|M_{u_1}\|_1, \|M_{u_2}\|_1\}$ , increasing the expected structural complexity as shown in Theorem 1. This contradicts optimal clustering.

**Step 2:** Since distinct true meta states cannot be merged, each active learned meta state  $\hat{u} \in \hat{U}_{\text{active}}$  corresponds to exactly one true meta state. That is, for each  $\hat{u} \in \hat{U}_{\text{active}}$ , there exists a unique  $u \in U$  such that:  $\{x : \hat{C}(x) = \hat{u}\} \subseteq \{x : C(x) = u\}$

**Step 3:** For any  $x \in \mathcal{X}$ , if  $\hat{C}(x) = \hat{u}$  and the corresponding true meta state is  $u$ , then by Assumption 1:

$$\hat{M}_{\hat{u}} = M_u$$

Therefore,  $M_{C(x)} = \hat{M}_{\hat{C}(x)}$  for all  $x \in \mathcal{X}$ , establishing observational equivalence.

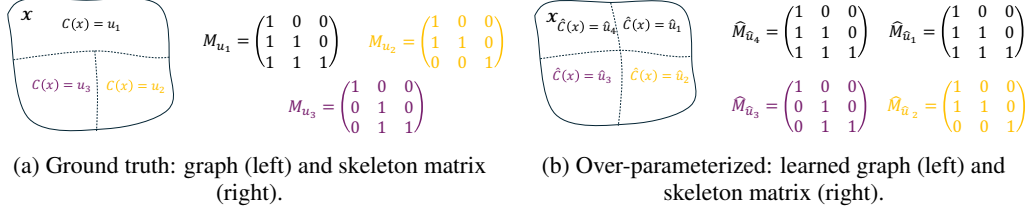

Figure 8: Illustration of Theorem 2. Each pair places the graph (left) alongside its causal skeleton matrix (right): (a) ground truth; (b) overparameterized solution.

□

## A.6 Discussion on Assumption 1

**Assumption 2.** Let  $\mathcal{MG} = \{\mathcal{G}_i\}_K$  be a Meta-Causal Graph with  $K$  causal subgraphs corresponding to distinct meta states  $u \in U$ . Consider a dataset  $\mathcal{D}$  where each sample is generated from one of these causal subgraphs. Let  $S_{\mathcal{D}} \subseteq \{1, 2, \dots, K\}$  denote the indices of causal subgraphs that actually contributed samples to  $\mathcal{D}$ . When learning a single causal graph  $\hat{\mathcal{G}}$  from the mixed dataset  $\mathcal{D}$  (treating all samples as if they were generated from a single causal subgraph), the estimated parent set for each variable  $X_j$  in  $\hat{\mathcal{G}}$  satisfies:

$$Pa_{\hat{\mathcal{G}}}(X_j) = \bigcup_{i \in S_{\mathcal{D}}} Pa_{\mathcal{G}_i}(X_j) \quad \forall j \in [p]. \quad (2)$$

Assumption 1 states that learning from mixed data generated by multiple causal subgraphs yields a unified graph capturing the union of all parent-child relationships across contributing subgraphs.

Figure 10 illustrates this assumption. The left panel shows the causal skeleton matrices  $M_u$  of individual subgraphs that contribute data to  $\mathcal{D}$ . The right panel shows the learned causal skeleton matrix  $\hat{M}$  from the pooled dataset. Red elements highlight the union property where edges present in any contributing subgraph appear in the learned graph.

Mathematically, this relationship can be expressed as:

$$\hat{M}[i, j] = \mathbb{I} \left[ \bigcup_{u \in S_{\mathcal{D}}} M_u[i, j] = 1 \right] \quad \forall i, j \in [p], \quad (3)$$

where  $\mathbb{I}[\cdot]$  is the indicator function, ensuring that an edge  $(i, j)$  exists in the learned graph if and only if it exists in at least one contributing subgraph.

This assumption is well-motivated: when data from multiple causal mechanisms are pooled without knowledge of their source, standard causal discovery algorithms tend to include all statistically supported edges to avoid missing true causal relationships. Violating this assumption would imply that the learning algorithm systematically ignores genuine causal relationships present in the data, leading to incomplete and potentially misleading causal models.

Assumption 1 shows that the L1 norm of the learned causal skeleton matrix is larger than the L1 norm of the causal skeleton matrix of the contributing graphs. This also provides a way to show that the underparameterization of meta states will lead to the failure of learning the causal graph.

Figure 9 shows an example of underparameterization. The upper figure shows the ground truth causal graph with three meta states and the corresponding causal skeleton matrix. The lower figure shows the learned graph with two meta states and the corresponding causal skeleton matrix. The underparameterization of the learned graph leads to the learned causal skeleton matrix different from the ground truth causal skeleton matrix (Equation 3).

However, overparameterization does not lead to the failure of learning the causal graph. Figure 8 shows an example of overparameterization. Although we may assign different meta states to states which are generated from the same causal graph, the data to learn each causal graph is still generated from the same causal graph.

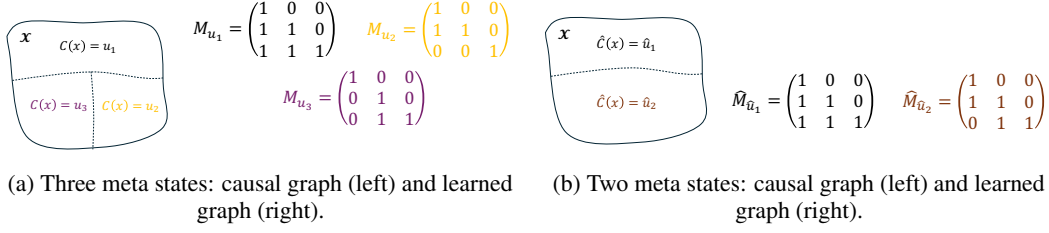

Figure 9: Illustration of the Assumption 1. The left figure shows the ground truth causal graph with three meta states and the corresponding causal skeleton matrix. The right figure shows the learned graph with two meta states and the corresponding causal skeleton matrix.

### A.7 Proof of Proposition 1

*Proof.* We prove that the given intervention condition ensures unique identifiability by showing that no two distinct DAGs can be interventionally Markov equivalent under  $\mathcal{I}$ .

Let  $\mathcal{D}_{\mathcal{I}}$  denote the interventional Markov equivalence class (I-MEC) of DAGs that are interventionally Markov equivalent to  $D$  given  $\mathcal{I}$ .

**Step 1:** Consider any edge  $i \rightarrow j$  in the true causal graph  $D$ . By assumption, there exists  $I \in \mathcal{I}$  such that exactly one of  $\{i, j\}$  is in  $I$ .

**Case 1:** If  $i \in I$  and  $j \notin I$ , then in the intervention graph  $D^{(I)}$ , all edges into node  $i$  are removed, but the edge  $i \rightarrow j$  (if it exists) remains. Consider any DAG  $D'$  with the reversed edge  $j \rightarrow i$ . In  $D'^{(I)}$ , this edge would be removed since  $i \in I$ , creating different intervention graphs:  $D^{(I)} \neq D'^{(I)}$ .

**Case 2:** If  $j \in I$  and  $i \notin I$ , then in  $D^{(I)}$ , all edges into  $j$  (including  $i \rightarrow j$ ) are removed. A DAG  $D'$  with edge  $j \rightarrow i$  would retain this edge in  $D'^{(I)}$  since  $i \notin I$ , again yielding  $D^{(I)} \neq D'^{(I)}$ .

**Step 2:** Since every edge  $i \rightarrow j \in D$  satisfies the intervention condition, every edge direction is uniquely determined by the interventional data, ensuring that for any DAG  $D' \in \mathcal{D}_{\mathcal{I}}$ , we have  $D^{(I)} = D'^{(I)}$  for all  $I \in \mathcal{I}$ .

**Step 3:** The intervention condition ensures that any edge orientation different from that in  $D$  would create distinguishable intervention graphs, contradicting interventional Markov equivalence. Therefore,  $|\mathcal{D}_{\mathcal{I}}| = 1$ , meaning  $D$  is uniquely identifiable.  $\square$

**Remark 1.** Score-based causal discovery methods identify structures only up to a Markov equivalence class, since different directed graphs can encode the same set of conditional independencies. Interventions, however, can break this equivalence: by actively perturbing variables, one can distinguish among graphs within the same class. For instance, in a causal chain  $A \rightarrow B \rightarrow C$ , an intervention on  $A$  affects  $C$  only through  $B$ . If  $B$  is not held fixed, a purely observational method might incorrectly infer a direct edge  $A \rightarrow C$ . To fully recover the underlying structure, multiple interventions, potentially on more than one variable, are required.

In our framework, this issue is addressed in two complementary steps. First, using interventional comparison (Proposition 1), we detect edge existence by contrasting causal subgraphs obtained from distinct interventions. Second, within each intervention subgraph, we apply a score-based refinement guided by structural minimality (Theorem 1). This ensures that adding spurious edges

$$M_{u_1} = \begin{pmatrix} 1 & 0 & 0 \\ \color{red}{1} & 1 & 0 \\ 0 & 0 & 1 \end{pmatrix} \quad M_{u_2} = \begin{pmatrix} 1 & 0 & 0 \\ 0 & 1 & 0 \\ 0 & \color{red}{1} & 1 \end{pmatrix} \quad \widehat{M}_u = \begin{pmatrix} 1 & 0 & 0 \\ \color{red}{1} & 1 & 0 \\ 0 & \color{red}{1} & 1 \end{pmatrix}$$

Figure 10: Illustration of the Assumption 1. The left side shows the causal skeleton matrices of causal graphs which contribute to the dataset for generating the data. The right side shows the learned causal skeleton matrices of the causal graph from the dataset. The elements in red highlight the differences between them.

such as  $A \rightarrow C$  would increase model complexity without improving fit, allowing the true causal structure to be uniquely identified.

### A.8 Reachability of Interventions

Environmental constraints often prevent direct manipulation of every state variable in practice. We consider a subset  $\mathcal{S}_c \subseteq [p]$  of variables permitting direct intervention, while others require multi-step sequences or remain unreachable. We define *intervention reachability*: a state is reachable if attainable from the current state via finite allowable intervention sequences.

Each state variable  $X_i$  takes  $n_i$  discrete values, represented using one-hot encoding as  $\mathbf{z}_i \in \{0, 1\}^{n_i}$  where exactly one element equals 1. The complete system state is  $\mathbf{z} = \mathbf{z}_1 \otimes \mathbf{z}_2 \otimes \cdots \otimes \mathbf{z}_p \in \{0, 1\}^N$ , where  $\otimes$  denotes the Kronecker product and  $N = \prod_{i=1}^p n_i$ .

**Remark 2.** *The Kronecker product of one-hot vectors remains one-hot. If  $\mathbf{z}_1 \in \{0, 1\}^m$  and  $\mathbf{z}_2 \in \{0, 1\}^n$  are one-hot vectors, then  $\mathbf{z} = \mathbf{z}_1 \otimes \mathbf{z}_2 \in \{0, 1\}^{mn}$  is also one-hot, with  $\mathbf{z}[nr+v] = \mathbf{z}_1[r]\mathbf{z}_2[v]$  for  $r \in [m], v \in [n]$ . Since  $\mathbf{z}_1$  and  $\mathbf{z}_2$  are one-hot encoded vectors, we have  $\mathbf{z}_1[r] \in \{0, 1\}$  and  $\mathbf{z}_2[v] \in \{0, 1\}$ .*

*Therefore,  $\mathbf{z}[nr+v] \in \{0, 1\}$  and there exists only one  $nr+v$  such that  $\mathbf{z}[nr+v] = 1$ .*

*Thus,  $\mathbf{z}$  is a one-hot encoded vector. Therefore, the Kronecker product of one-hot encoded vectors is still a one-hot encoded vector.*

*The Kronecker product  $\mathbf{z}$  is a one-hot encoded vector, which can represent the state of the system.*

We define two key matrices:

- **Intervention Matrix**  $F \in \{0, 1\}^{N \times N}$ :  $F[i, j] = 1$  if state  $j$  can be directly reached from state  $i$  through intervention on variables in  $\mathcal{S}_c$ .
- **Transition Matrix**  $T \in \{0, 1\}^{N \times N}$ :  $T[i, j] = 1$  if the system naturally transitions from intervened state  $i$  to state  $j$ .

Given a state vector  $\mathbf{z} \in \{0, 1\}^N$ , the intervention operation  $\mathbf{z}' = F\mathbf{z}$  produces:

$$\mathbf{z}'[k] = \sum_{i=1}^N F[k, i]\mathbf{z}[i]$$

Since  $\mathbf{z}$  is one-hot,  $\mathbf{z}'[k] > 0$  if and only if there exists an index  $i$  such that  $\mathbf{z}[i] = 1$  and  $F[k, i] = 1$ . This means state  $k$  is directly reachable from the current state  $i$  through intervention. The non-zero elements of  $F\mathbf{z}$  thus indicate all states achievable by a single intervention step.

Similarly, the transition operation  $\mathbf{z}'' = T\mathbf{z}'$  yields:

$$\mathbf{z}''[k] = \sum_{i=1}^N T[k, i]\mathbf{z}'[i]$$

Here,  $\mathbf{z}''[k] > 0$  indicates that state  $k$  can be reached from some intervened state  $i$  where  $\mathbf{z}'[i] > 0$  and  $T[k, i] = 1$ . This captures the natural system dynamics following intervention.

Combining these operations, the complete system evolution under intervention is:

$$\mathbf{z}_{t+1} = TF\mathbf{z}_t$$

This composition first applies interventions (via  $F$ ) to determine immediately accessible states, then applies system dynamics (via  $T$ ) to find the resulting states after natural transitions. The non-zero elements in  $(TF)^k \mathbf{z}_0$  represent all states reachable within  $k$  intervention-transition cycles from  $\mathbf{z}_0$ .

**Theorem 3** (Reachability Analysis). *A state corresponding to index  $i$  is reachable from initial state  $\mathbf{z}_0$  if and only if there exists  $k \geq 0$  such that  $[(TF)^k \mathbf{z}_0][i] > 0$ .*

*Proof.* We prove both directions of the equivalence.

( $\Rightarrow$ ): If state  $i$  is reachable from  $\mathbf{z}_0$ , then by definition there exists a finite sequence of intervention-transition steps that leads from  $\mathbf{z}_0$  to a state where the  $i$ -th component is active. This sequence corresponds to some power  $k$  of the operator  $TF$ , hence  $[(TF)^k \mathbf{z}_0][i] > 0$ .

( $\Leftarrow$ ): If  $[(TF)^k \mathbf{z}_0][i] > 0$  for some  $k \geq 0$ , then by the definition of matrix-vector multiplication, there exists a computational path through  $k$  iterations of intervention-transition operations that activates the  $i$ -th state component, demonstrating reachability.  $\square$

The reachability analysis has direct consequences for causal structure learning:

**Corollary 1** (Intervention Feasibility). *The state corresponding to index  $i$  is feasible from initial state  $\mathbf{z}_0$  by intervention if and only if there exists  $k \geq 0$  such that  $[F(TF)^k \mathbf{z}_0][i] > 0$ .*

*Proof.* This follows directly from Theorem 3. Here,  $F(TF)^k \mathbf{z}_0$  represents states accessible for intervention after  $k$  cycles, where the leading  $F$  captures the final intervention step.  $\square$

This constraint fundamentally limits causal discovery scope in practical settings. The Curious Causality-Seeking Agent must therefore operate within feasible intervention constraints while maximizing causal structure identification. We provide an example to illustrate these results.

**Case 1.** Consider a system with two binary variables  $x_1, x_2$ , yielding four possible states as shown in Table 3. As  $z_1$  and  $z_2$  are one-hot encoded vectors, the Kronecker product of  $z_1$  and  $z_2$  is a

Table 3: One-hot encoding of  $x_1$  and  $x_2$  and their Kronecker product.

| $x_1$ | $x_2$ | $z_1$         | $z_2$         | $z = z_1 \otimes z_2$ |
|-------|-------|---------------|---------------|-----------------------|
| 0     | 0     | $[1, 0]^\top$ | $[1, 0]^\top$ | $[1, 0, 0, 0]^\top$   |
| 1     | 0     | $[0, 1]^\top$ | $[1, 0]^\top$ | $[0, 1, 0, 0]^\top$   |
| 0     | 1     | $[1, 0]^\top$ | $[0, 1]^\top$ | $[0, 0, 1, 0]^\top$   |
| 1     | 1     | $[0, 1]^\top$ | $[0, 1]^\top$ | $[0, 0, 0, 1]^\top$   |

4-dimensional one-hot encoded vector, which can represent the state of the system. The space of the system can be represented as  $\mathcal{Z} = \{[1, 0, 0, 0]^\top, [0, 1, 0, 0]^\top, [0, 0, 1, 0]^\top, [0, 0, 0, 1]^\top\}$ . For  $z_i, z_j \in \mathcal{Z}$ , if  $z_j$  can be reached from  $z_i$  by intervening on  $x_i$ , we can denote this as  $F[i, j] = 1$ .

**Intervention Constraints:** Suppose only  $x_1$  can be directly intervened. The intervention matrix  $F$  allows transitions between states that differ only in  $x_1$ :

$$F = \begin{bmatrix} 1 & 1 & 0 & 0 \\ 1 & 1 & 0 & 0 \\ 0 & 0 & 1 & 1 \\ 0 & 0 & 1 & 1 \end{bmatrix}$$

**System Dynamics:** After intervention, assume the system exchanges the values of  $x_1$  and  $x_2$ . The transition matrix becomes:

$$T = \begin{bmatrix} 1 & 0 & 0 & 0 \\ 0 & 0 & 1 & 0 \\ 0 & 1 & 0 & 0 \\ 0 & 0 & 0 & 1 \end{bmatrix}$$

**Reachability Analysis:** Starting from  $\mathbf{z}_0 = [1, 0, 0, 0]^\top$  (state (0,0)):

Step 1: Direct intervention possibilities:

$$F\mathbf{z}_0 = \begin{bmatrix} 1 \\ 1 \\ 0 \\ 0 \end{bmatrix}$$

States 1 and 2 are accessible for intervention.

Step 2: After one intervention-transition cycle:

$$TF\mathbf{z}_0 = \begin{bmatrix} 1 \\ 0 \\ 1 \\ 0 \end{bmatrix}$$

The system can reach states 1 and 3.

Step 3: Interventions possible from these new states:

$$F(TF\mathbf{z}_0) = F \begin{bmatrix} 1 \\ 0 \\ 1 \\ 0 \end{bmatrix} = \begin{bmatrix} 1 \\ 1 \\ 1 \\ 1 \end{bmatrix}$$

All states become reachable for intervention within two cycles, demonstrating that despite initial constraints, the system’s dynamics enable full state space exploration.

### A.9 Action as Intervention

Our method identifies context-dependent causal graphs (meta-graphs) via interventions. Actions are how the curiosity-driven agent realizes those interventions. When actions can directly intervene each state (e.g., a chemical environment), we deploy targeted interventions to isolate edges and quickly distinguish meta states and their subgraphs. When not all interventions are feasible, we rely on the reachability assumption.

**Verification Results.** We add a new experiment based on a manipulation task to demonstrate that our method can handle cases where actions cannot intervene on all variables. We also modify this environment to test generalization. The results show that our method maintains strong performance and generalizes well, even when only a subset of variables is directly intervenable.

Table 4: Performance on partial-intervention manipulation tasks.

| Reward | Small Magnetic Force ( $\times 0.02$ ) | High Ball Density ( $\times 10$ )   | Extra Table Friction                |
|--------|----------------------------------------|-------------------------------------|-------------------------------------|
| MLP    | $4.011 \pm 0.030$                      | $3.999 \pm 0.038$                   | $3.886 \pm 0.241$                   |
| FCDL   | $4.482 \pm 0.622$                      | $4.451 \pm 0.657$                   | $4.193 \pm 0.655$                   |
| MCG    | <b><math>6.173 \pm 0.255</math></b>    | <b><math>5.083 \pm 0.245</math></b> | <b><math>5.517 \pm 0.134</math></b> |

### A.10 Lossy Representation and Misclassification Probability

We analyze how lossy representation affects the probability of mapping samples to prototype embeddings. Table 5 summarizes the key notations used in this derivation.

We assume that for each state  $x$  with true meta state  $C(x) = u$ , the probability that it is mapped by the encoder to the codebook entry index  $\hat{u}_k$  is  $p_k^u = P(\hat{C}(x) = \hat{u}_k \mid C(x) = u)$ . This probability reflects the representation power and discriminability of the encoder, indicating how likely samples of the same true meta state are mapped to different codebook entry.

From Definition 5,  $\hat{C}(x)$  and  $C(x)$  are *observationally equivalent* if, for all  $\hat{u}_k \in \hat{U}$  and all  $x_1, x_2 \in \{x \mid \hat{C}(x) = \hat{u}_k\}$ , it holds that  $C(x_1) = C(x_2)$ .

The probability that  $\hat{C}(x)$  and  $C(x)$  are observationally equivalent is given by

$$P(C(x) = u, \forall x' \in x \mid \hat{C}(x) = \hat{u}_k, C(x') = u) = (1 - p_k + p_k^u \mu_u)^n,$$

where  $n$  is the number of samples.

Hence, the overall probability of observational equivalence is

$$P_{\text{equiv}} = \sum_k p_k \sum_{u \in U} \mu_u (1 - p_k + p_k^u \mu_u)^n.$$

Table 5: Notation summary.

| Symbol                             | Meaning                                                             |
|------------------------------------|---------------------------------------------------------------------|
| $U = u$                            | Ground-truth meta states                                            |
| $\hat{U} = \hat{u}_k$              | Prototype (codebook) embeddings                                     |
| $C(x)$                             | True meta state of sample $x$                                       |
| $\hat{C}(x)$                       | Codebook entry selected by encoder                                  |
| $\mu_u$                            | Prior probability of state $x$ with true meta state $u$             |
| $p_k = \sum_{u \in U} \mu_u p_k^u$ | Probability of mapping sample $x$ to codebook entry $e_{\hat{u}_k}$ |

The probability that all samples assigned to the same codebook entry index  $\hat{C}(x)$  belong to different true meta states is

$$P_{\text{diff}} = \sum_k \sum_{u \in U} (p_k - \mu_u p_k^u) (1 - p_k + p_k^u \mu_u)^n.$$

The probability of misclassification, i.e., that a codebook entry corresponds to mixed true meta states, is

$$P_{\text{misclass}} = 1 - \sum_k p_k \sum_{u \in U} (1 - p_k + p_k^u \mu_u)^n.$$

Considering lossy representation, the misclassification probability simplifies to

$$P(\text{misclassification}) = 1 - \sum_k \sum_{u \in U} \mu_u p_k^u (1 - p_k + p_k^u \mu_u)^n.$$

If  $n(p_k + p_k^u \mu_u) \ll 1$ , we approximate

$$P(\text{misclassification}) \approx n \sum_u \sum_k \mu_u p_k^u (p_k - p_k^u \mu_u) = \sum_k \left[ p_k^2 - \sum_u (\mu_u p_k^u)^2 \right].$$

In a more accurate representation, for each codebook entry index  $k$ , the distribution of  $\mu_u p_k^u$  concentrates on a single true state—one  $p_k^u$  increases while others decrease, thereby increasing  $\sum_u (\mu_u p_k^u)^2$  and reducing each term  $[p_k^2 - \sum_u (\mu_u p_k^u)^2]$ . Consequently, higher representation accuracy monotonically decreases the overall misclassification probability, reaching zero when each prototype corresponds purely to one true meta state.

## B Experimental Details

### B.1 Environment

**Chemical.** We evaluate our method’s performance on learning context-dependent causal structures using the Chemical environment [39]. This environment consists of 10 objects, each capable of taking one of 5 color states. An action selects a target object and changes its state, triggering cascading changes to all dependent objects according to the underlying causal graph. The objective is to match each object’s color to a specified target configuration.

The Chemical environment features multiple causal structures that switch dynamically based on the system state, making it ideal for evaluating Meta-Causal Graph learning. We consider two experimental settings in this environment:

**Full-Fork (Fork):** The causal structure alternates between two graphs depending on the root node’s color. When the root node is red, a fork structure is active; otherwise, a fully-connected structure governs the system dynamics.

**Full-Chain (Chain):** The causal structure alternates between full and chain configurations. A red root node activates the chain structure, while other colors trigger the fully-connected structure.

These settings test our agent’s ability to: (1) discover the latent meta states (root node colors) that determine causal structure transitions, (2) learn the corresponding causal subgraphs through

interventional exploration, and (3) generalize to unseen state configurations during evaluation. During the test, some nodes are corrupted with noise. The agent needs to learn the causal graph to match the colors of nodes to the target. The agent starts from a random color configuration and must transform a 10-node graph to match a target color pattern. Actions intervene on nodes, changing their color and that of all their descendants according to the hidden causal graph. The episode reward is the negative Hamming distance to the target (0 for a perfect match).

**Magnetic.** The *Magnetic* environment is a robot arm manipulation task built on the Robosuite framework (Figure 4). The environment contains two objects: a fixed box and a movable ball, whose colors indicate their magnetic properties. When both objects are red, they exhibit magnetic attraction, causing the ball’s trajectory to be influenced by the box’s position. The magnetic properties of each object are randomly assigned at the beginning of each episode.

## B.2 Reinforcement Learning Algorithm

For fair comparison, we use the same model based reinforcement learning algorithm for all the baselines and our method. We use the cross-entropy method (CEM) [61] to sample the action based on the predicted transition dynamics. The detailed hyper-parameters are shown in the Table 6.

Table 6: CEM parameter.

| CEM parameters           | Chemical  |            | Magnetic   |
|--------------------------|-----------|------------|------------|
|                          | full-fork | full-chain |            |
| Planning length          | 3         | 3          | 1          |
| Number of candidates     | 64        | 64         | 64         |
| Number of top candidates | 32        | 32         | 32         |
| Number of iterations     | 5         | 5          | 5          |
| Exploration noise        | N/A       | N/A        | 1e-4       |
| Exploration probability  | 0.05      | 0.05       | N/A        |
| Action type              | Discrete  | Discrete   | Continuous |

## B.3 Environment Configurations

The detailed environment configurations are shown in Table 7.

Table 7: Environment configurations

| Parameters         | Chemical          |                   | Magnetic        |
|--------------------|-------------------|-------------------|-----------------|
|                    | Fork              | Chain             |                 |
| Training step      | $1.5 \times 10^5$ | $1.5 \times 10^5$ | $2 \times 10^5$ |
| Optimizer          | Adam              | Adam              | Adam            |
| Learning rate      | 1e-4              | 1e-4              | 1e-4            |
| Batch size         | 256               | 256               | 256             |
| Initial step       | 1000              | 1000              | 1500            |
| Max episode length | 25                | 25                | 25              |
| Action type        | Discrete          | Discrete          | Continuous      |

## B.4 Partial Observability

Table 8: Prediction accuracy under partial observability in the Chemical environment.

| Prediction Accuracy | $n = 2$                            | $n = 4$                            | $n = 6$                             |
|---------------------|------------------------------------|------------------------------------|-------------------------------------|
| MLP                 | $31.93 \pm 0.16$                   | $32.47 \pm 1.61$                   | $33.72 \pm 2.11$                    |
| FCDL                | $63.75 \pm 13.75$                  | $53.89 \pm 11.95$                  | $52.11 \pm 16.43$                   |
| <b>MCG (ours)</b>   | <b><math>73.52 \pm 9.56</math></b> | <b><math>63.71 \pm 5.79</math></b> | <b><math>57.05 \pm 14.63</math></b> |



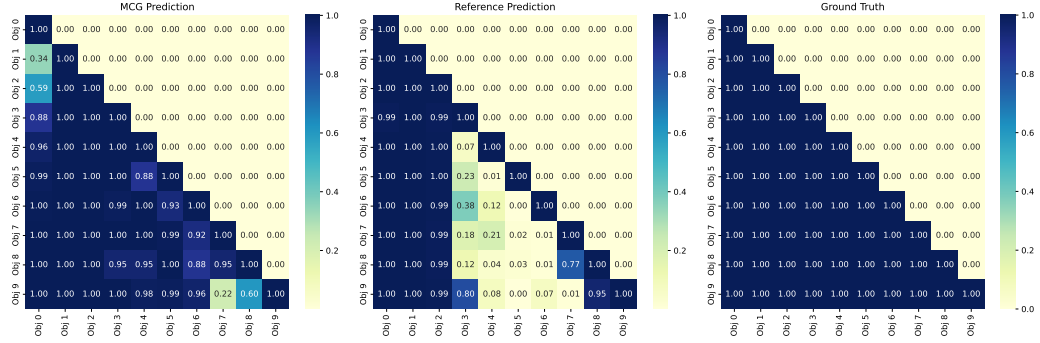

(a) Causal subgraph of *Full*.

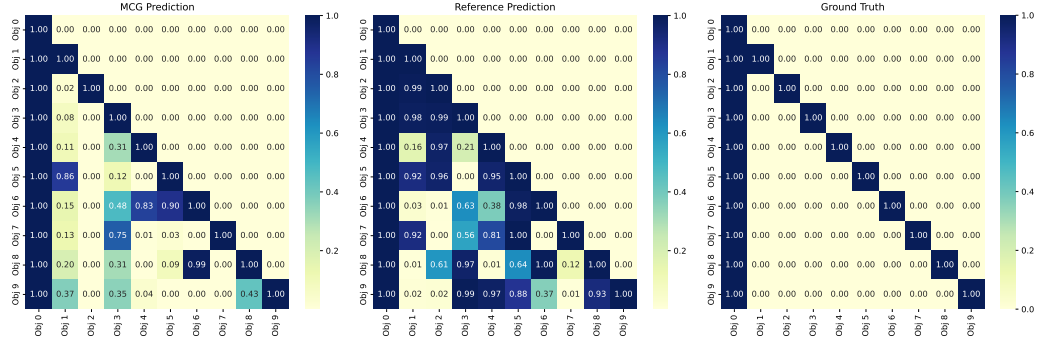

(b) Causal subgraph of *Fork*.

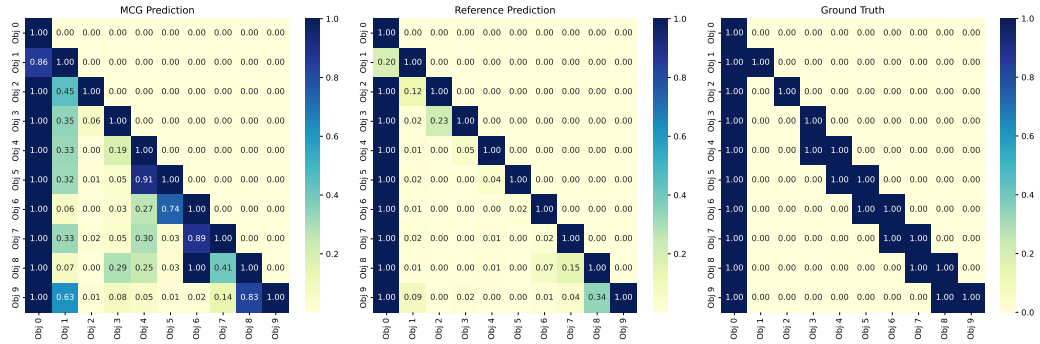

(c) Causal subgraph of *Chain*.

Figure 11: Comparison of learned causal graphs in task Chemical. MCG (ours) is the proposed method and the reference is the causal graph learned by FCDL.

## B.5 Extended Results

We visualize the learned causal subgraphs in Figure 11. The results demonstrate that our method effectively captures the underlying causal structures of the environment.

## B.6 Compute Resources and Environment Details

Most experiments were conducted on a server equipped with an AMD EPYC 7V13 64-Core Processor (24 physical cores), supporting 32-bit and 64-bit modes, with 96 MiB L3 cache and 12 MiB L2 cache. The machine was equipped with an NVIDIA A100 PCIe GPU with 80GB memory (driver version 575.51.03, CUDA version 12.9).

## B.7 Code and Demo

The code is available at <https://github.com/zhiyu-zhao-ucas/Meta-Causal-Graph.git>, and demonstrations can be found at <https://sites.google.com/view/meta-causal-world>.

## B.8 Prediction accuracy for three intrinsic terms

Table 9: Prediction accuracy for three intrinsic terms. All values are reported in percentage %.

| Intrinsic Term                      | Fork              |                   |                   | Chain             |                  |                  |
|-------------------------------------|-------------------|-------------------|-------------------|-------------------|------------------|------------------|
|                                     | $n=2$             | $n=4$             | $n=6$             | $n=2$             | $n=4$            | $n=6$            |
| Prediction Uncertainty              | $52.25 \pm 16.73$ | $59.46 \pm 22.38$ | $52.25 \pm 28.46$ | $59.52 \pm 8.82$  | $54.81 \pm 5.47$ | $59.28 \pm 5.03$ |
| Feature Discrepancy                 | $46.11 \pm 8.38$  | $41.17 \pm 5.67$  | $43.67 \pm 2.47$  | $56.01 \pm 13.13$ | $51.88 \pm 7.22$ | $58.27 \pm 8.53$ |
| Predictive-Distribution Discrepancy | $54.23 \pm 8.72$  | $46.27 \pm 9.74$  | $43.92 \pm 1.85$  | $36.83 \pm 3.11$  | $40.33 \pm 4.89$ | $45.40 \pm 2.83$ |
| Edge-Entropy                        | $63.18 \pm 13.94$ | $50.47 \pm 9.87$  | $50.04 \pm 8.56$  | $51.99 \pm 6.58$  | $49.78 \pm 4.11$ | $49.69 \pm 5.14$ |

## B.9 Efficiency

We compare other methods (GNN and MLP) with longer training rounds and more parameters to show efficiency of our method. Results are reported in Table 10 and Table 11.

Table 10: Comparison under the same model size. We evaluate the efficiency of our method by comparing MCG with GNN and MLP trained for longer rounds and with larger parameter counts.

|                        | Acc n=2      | Acc n=4      | Acc n=6      | Reward n=2   | Reward n=4   | Reward n=6   |
|------------------------|--------------|--------------|--------------|--------------|--------------|--------------|
| GNN (30k round)        | 38.13        | 25.81        | 20.75        | 6.83         | 6.06         | 6.83         |
| GNN (25k round)        | 36.37        | 26.55        | 20.73        | 6.84         | 5.98         | 6.19         |
| MLP (30k round)        | 30.47        | 28.94        | 27.84        | 6.20         | 6.13         | 6.71         |
| MLP (25k round)        | 31.47        | 30.32        | 30.42        | 6.18         | 6.03         | 6.23         |
| <b>MCG (10k round)</b> | <b>47.01</b> | <b>48.37</b> | <b>46.35</b> | <b>11.96</b> | <b>10.83</b> | <b>10.70</b> |
| <b>MCG (12k round)</b> | <b>48.30</b> | <b>48.40</b> | <b>47.28</b> | <b>12.45</b> | <b>10.77</b> | <b>10.84</b> |
| <b>MCG (15k round)</b> | <b>71.56</b> | <b>59.17</b> | <b>49.58</b> | <b>14.65</b> | <b>14.06</b> | <b>13.28</b> |

Table 11: Comparison under the same number of training rounds. MCG is compared with GNN and MLP models trained for the same number of rounds but with different model sizes (parameter counts shown in parentheses).

|                                              | Acc n=2      | Acc n=4      | Acc n=6      | Reward n=2   | Reward n=4   | Reward n=6   |
|----------------------------------------------|--------------|--------------|--------------|--------------|--------------|--------------|
| MLP (parameter $\times 3.71$ )               | 24.65        | 25.05        | 23.71        | 6.29         | 6.50         | 7.93         |
| GNN (parameter $\times 1.66$ )               | 37.58        | 30.61        | 30.05        | 6.34         | 6.49         | 7.90         |
| <b>MCG (parameter <math>\times 1</math>)</b> | <b>71.56</b> | <b>59.17</b> | <b>49.58</b> | <b>14.65</b> | <b>14.06</b> | <b>13.28</b> |

## C Extended Related Work

### C.1 World Models

Contemporary research on world models can be delineated along two principal trajectories, each characterized by fundamentally divergent objectives. The first research trajectory conceptualizes world models as instrumental components, primarily serving either as predictive mechanisms to facilitate planning processes or as training apparatuses for policy optimization. Conversely, the second research trajectory approaches world models as generative frameworks, with the explicit objective of predicting future environmental states with high fidelity.

Within the first trajectory, numerous approaches leverage world models as predictive mechanisms to facilitate planning processes. Notable exemplars include methodologies employing Monte Carlo Tree Search (MCTS) to identify optimal action sequences [65, 12, 17] and techniques utilizing cross-entropy methods to efficiently sample continuous actions [25]. Complementary to these, a substantial corpus of research utilizes world models to augment policy learning, wherein the learned dynamics models either provide supplementary supervision signals or function as synthetic environments for policy optimization. This subcategory encompasses seminal works such as Dreamer [22, 23, 24], SimPLe [38], IRIS [53],  $\Delta$ -IRIS [54], and DART [1]. These methodologies predominantly employ model-based reinforcement learning frameworks, wherein learned dynamics models generate synthetic data to facilitate policy model training.

The second trajectory is predominantly focused on the development of sophisticated generative models designed to predict future environmental states with high verisimilitude. Representative examples include DIAMOND [3], Navigation world models [4], Oasis [11], and The Matrix [16]. These models are engineered to capture the underlying stochastic dynamics of complex environments and generate realistic future states conditioned on current states and selected actions.

Notwithstanding these advancements, it is imperative to acknowledge that methodologies relying predominantly on statistical correlations frequently exhibit performance degradation when confronted with distributional shifts in environmental conditions, thereby compromising their capacity for robust generalization across diverse scenarios.

### C.2 Causal Discovery for World Models

Causal discovery offers a rigorous analytical framework for addressing the inherent challenges associated with distributional shifts in world models. By elucidating and exploiting causal relationships rather than mere statistical correlations, these methodologies significantly enhance both the interpretability and generalization capabilities of learned models, thereby facilitating more robust decision-making processes in complex, non-stationary environments.

The methodological landscape of causal discovery can be taxonomized into two principal categories: constraint-based approaches and score-based approaches. Constraint-based methodologies, exemplified by the PC algorithm [68], employ conditional independence tests to systematically infer causal relationships among variables. Conversely, score-based approaches utilize statistical evaluation metrics to assess the plausibility of alternative causal structures. Prominent instantiations include the Greedy Equivalence Search (GES) [51], which implements a greedy search algorithm to optimize a predefined scoring function, and methods leveraging the Bayesian Information Criterion (BIC). Both methodological paradigms endeavor to recover causal graphs by identifying the Markov equivalence class of the underlying causal structure. Nevertheless, it is imperative to acknowledge that the causal graph learned through these approaches is not uniquely identifiable, as multiple distinct causal architectures can manifest identical conditional independence relationships.

To mitigate this fundamental identifiability challenge, contemporary advancements in causal discovery have increasingly focused on incorporating interventional data to enhance the discriminability of causal structures [69, 52, 33, 72, 6, 66, 37]. Despite these methodological innovations, a significant limitation persists: these approaches frequently operate under the restrictive assumption that the underlying causal graph remains temporally invariant throughout the learning process. This stationarity assumption may be violated in dynamic environments, wherein causal structures can evolve temporally due to myriad factors.

### C.3 Comparison with FCDL

**Motivation and Comparison to Context-Dependent Causality.** The initial motivation for our work came from a fundamental question: Why do causal discovery methods often fail in open-ended environments?

We observed that causal models aim to describe the rules of the world. However, in open-ended settings (e.g., open-ended games, multi-agent systems, or LLM-based dialogue), no single observation window can capture all possible events. This leads to instability: a causal relation valid in one context may fail in another. For example, Newtonian physics holds at the macroscopic level but breaks down at the quantum scale. FCDL also emphasizes this issue (but it’s not the first one), arguing that a complete causal law must account for variation across different contexts. Therefore, our high-level motivation aligns with them. many previous works have explored this motivation context-dependent causal structures.

However, FCDL is not the first one discusses about context-dependent causality. The idea of context-dependent causality was formally introduced by earlier Huang et al. [29], and also discussed earliest in Chapter 10 of Pearl’s Causality [56].

**Exploration and the Limitation of Passive Learning.** A key challenge in scaling up to open-ended worlds is how to explore effectively. Relying solely on random exploration or limited observed data is insufficient to discover hidden causal mechanisms. For instance, in scientific discovery, new causal knowledge often emerges only after targeted investigation of paradoxes. Similarly, in dialogue agents, causal relationships may even reverse depending on the context. Unlike prior works including FCDL and Huang et al. [29], which rely solely on observation passive data, our method explicitly considers the unobserved causal space, and how newly explored data may lead to shifts in both the causal graph and the context boundary.

**Causality-Seeking Agent.** We aims to go beyond passive modeling to active exploration for causal discovery. Our curiosity and intervention-based strategy address a core limitation of data-driven methods: the inability to discover unknown causal structures. Our primary theoretical contribution is the construction of a formal intervention-based meta-causal graph, with associated theorems and learning framework.

### C.4 Connections to Model-Based RL and Probabilistic Graphical Models

Our framework can be viewed as a special case of model-based RL (MBRL): we learn a world model and use it to plan. The difference lies in the causal structure we learn and use. Classical factored or relational MBRL methods learn structured predictive models [20, 42, 60], which improve sample-efficiency but typically remain correlational. By contrast, we explicitly model a Meta-causal graph whose edges carry interventional semantics (actions are treated as interventions), and we pair structure learning with intervention design and identifiability analysis for context-dependent mechanisms (meta states).

From the viewpoint of probabilistic graphical models (PGMs), our method instantiates a structural causal model (SCM) with a discrete context variable  $u$  (the meta state): each context selects a graph  $\mathcal{G}_u$  and its causal skeleton  $M_u$ , while the decoder  $D$  outputs a probabilistic mask  $\hat{M}_u$  that we discretize via Gumbel reparameterization. This preserves the graphical factorization of a PGM but endows it with *interventional* semantics in the sense of Pearl’s do-calculus [56]. Practically, this differs from standard PGM-based world models by (i) targeting *causal* edges rather than solely predictive factors, (ii) using curiosity-driven interventions to break equivalence classes, and (iii) handling changing mechanisms via meta states with an adaptive, minimal codebook.

Finally, our curiosity module is compatible with latent-variable exploration used in POMDP-style MBRL: intrinsic objectives (entropy, feature discrepancy, predictive-NLL, accuracy) can be plugged in as information-seeking criteria, but here they are *aimed at* reducing uncertainty over *causal structure* (meta states and edges), not only over hidden state trajectories.

## D Theoretical Connections between Meta-Causal Graphs, Open-Endedness, and Gödel Machines

Open-endedness is defined in terms of continuous novelty and learnability, highlighting its significance for creating artificial superhuman intelligence (ASI) [30]. Additionally, the Gödel Machine concept proposed encapsulates self-referential improvement mechanisms through formal proof-driven code rewriting. Here, we analyze the theoretical relationships between the MCG framework, open-endedness, and the Gödel Machine [63].

### D.1 Open-Endedness and Meta-Causal Graphs

The Meta-Causal Graph framework establishes connections with open-endedness and self-improving systems. Open-endedness is characterized by continuous generation of novelty within comprehensible boundaries, a foundational requirement for advanced artificial intelligence systems. Our MCG framework demonstrates key open-ended properties in several fundamental ways:

First, the curious causality-seeking agent operationalizes open-ended exploration through a curiosity-driven intervention strategy. By maximizing entropy-based reward signals focused on regions of causal uncertainty, the agent persistently generates novel interventions and discoveries. This mechanism directly addresses the novelty requirement of open-endedness, as the agent autonomously uncovers and probes previously uncharted causal relationships and latent meta states.

The MCG framework maintains interpretability by organizing new causal knowledge within an explicit meta-causal graph. As new mechanisms are discovered, they are systematically integrated, ensuring ongoing comprehensibility despite growing complexity. Vector quantization further enables efficient and semantically clear assignment of novel observations to distinct meta states.

The MCG framework thus marks a step toward genuinely open-ended learning systems capable of autonomously exploring, understanding, and adapting to complex, dynamic environments with evolving causal structures.

### D.2 Gödel Machines and Meta-Causal Graphs

It is important to note that while the MCG framework does not implement Gödel Machine-style code-level self-rewriting, its core mechanism nevertheless embodies a form of self-improvement focused on its own knowledge structure (the Meta-Causal Graph). The curious causality-seeking agent, driven by curiosity-based rewards, actively collects new data and, upon encountering prediction failures or high uncertainty, dynamically refines and expands its set of causal subgraphs and meta state mappings. This process ensures the agent can continually update and improve its world model in open environments, achieving self-correction and knowledge-level self-evolution.

## E Implementation Details

### E.1 Meta-Causal Graph Learning from Experience

We learn causal subgraphs under latent meta states from agent experience. Following FCDL’s pioneering use of the VQ-VAE architecture for causal-graph discovery [31], we adopt the original VQ-VAE framework of van den Oord et al. [74] to learn the causal subgraph for each meta state. Specifically, the process contains two steps: (1) identifying the latent meta state, which activates a specific causal subgraph, and (2) learning the subgraph from the agent’s explored experience data.

**Identifying Latent Meta State:** We embed the observed state and assign it to a corresponding meta state  $u \in U$  by vector quantization as follows. We define the meta state assignment as  $C(x) = \arg \min_{u \in U} \|E(x) - z_u\|_2^2$ , where  $E: \mathcal{X} \rightarrow \mathbb{R}^d$  is an encoder mapping the observed state  $x$  to a  $d$ -dimensional embedding, and  $\{z_u\}_{u \in U} \subset \mathbb{R}^d$  is a learnable codebook of prototype embeddings, each representing a distinct meta state.

**Subgraph Learning:** After obtaining the embedding  $z_u$  for a given state, we employ a decoder network  $D: \mathbb{R}^d \rightarrow [0, 1]^{p \times p}$  to predict a probability matrix  $\hat{M}_u$ , which estimates the underlying causal skeleton matrix  $M_u$  of  $\mathcal{G}_u$ . Each entry  $\hat{M}_u[i, j]$  denotes the probability that the directed edge

$i \rightarrow j$  is present in causal subgraph associated with meta state  $u$ . We then sample each  $M_u[i, j]$  from  $\text{Bernoulli}(\hat{M}_u[i, j])$  using the Gumbel-Softmax reparameterization [35, 50], enabling end-to-end gradient-based learning of the discrete structure. To update the codebook, we use the following update rule:

$$\mathcal{L}_{\text{quantization}} = \|\text{sg}(E_\phi(X)) - z_u\|_2^2 + \beta \|\text{sg}(z_u) - E_\phi(X)\|_2^2,$$

where  $\text{sg}(\cdot)$  is the stop-gradient operator. The first term is the reconstruction loss and the second term is the commitment loss to avoid the output of the encoder growing arbitrarily [74].
